# Supplementary material for: Valeriadimers A–C, three sesquiterpenoid dimers from valeriana officinalis var. latifolia
Source: Royal Society of Chemistry journal article supplement (doi:10.1039/c4ra11439f), 2014-12-15
Supplement: c4ra11439f1.pdf [file c4ra11439f1.pdf]

## Supporting Information

### Valeriadimers A-C, three sesquiterpenoid dimers from *Valeriana officinalis* var. *latifolia*†

Zhu-zhen Han,<sup>‡a,b</sup> Ji-Ye,<sup>‡a</sup> Qing-Xin Liu,<sup>a</sup> Yun-heng Shen,<sup>a</sup> Rong-Cai Yue,<sup>a</sup>  
Hui-Liang Li<sup>\*a</sup> and Wei-Dong Zhang<sup>\*a,b,c</sup>

---

<sup>a</sup> Department of Phytochemistry, School of Pharmacy, Second Military Medical University, 325  
Guohe Road, Shanghai 200433, P. R. China. Fax: +86 (0)21 81871244; Tel: +86 (0)21 81871244;  
E-mail: faranli@hotmail.com, wdzhangy@hotmail.com.

<sup>b</sup> Institute of Chinese Materia Medica, Shanghai University of Traditional Chinese Medicine,  
Shanghai 201203, P. R. China

<sup>c</sup> Shanghai Jiao Tong University, Shanghai 200030, P. R. China

† Electronic Supplementary Information (ESI) available: The extraction scheme, compound  
characterization, spectroscopic data, and CIF files of **1** and **3** are included herein. See  
DOI: 10.1039/b000000x/

‡ Zhu-zhen Han and Ji Ye contributed equally to this work.

---

## Contents

### Experimental section

**Table S1**  $^1\text{H}$  NMR and  $^{13}\text{C}$  NMR Data of **1**

**Table S2**  $^1\text{H}$  NMR and  $^{13}\text{C}$  NMR Data of **2**

**Table S3**  $^1\text{H}$  NMR and  $^{13}\text{C}$  NMR Data of **3**

**Table S4** Cell viability of **1**, **2**, and **3**

**Figure S1** the structure of Valeriadimer A (**1**), Valeriadimer B (**2**), and Valeriadimer C (**3**)

**Figure S2** HRESIMS spectrum of **1**

**Figure S3** IR spectrum of **1**

**Figure S4** 500 MHz  $^1\text{H}$  NMR spectrum of **1** in  $\text{CDCl}_3$

**Figure S5** 125 MHz  $^{13}\text{C}$  NMR spectrum of **1** in  $\text{CDCl}_3$

**Figure S6** 125 MHz DEPT NMR spectrum of **1** in  $\text{CDCl}_3$

**Figure S7** 500 MHz HSQC NMR spectrum of **1** in  $\text{CDCl}_3$

**Figure S8** 500 MHz  $^1\text{H}$ - $^1\text{H}$  COSY NMR spectrum of **1** in  $\text{CDCl}_3$

**Figure S9** 500 MHz HMBC NMR spectrum of **1** in  $\text{CDCl}_3$

**Figure S10** 500 MHz NOESY NMR spectrum of **1** in  $\text{CDCl}_3$

**Figure S11** Single X-ray crystal structure and Packing diagram of **1**

**Figure S12** HRESIMS spectrum of **2**

**Figure S13** IR spectrum of **2**

**Figure S14** 500 MHz  $^1\text{H}$  NMR spectrum of **2** in  $\text{CDCl}_3$

**Figure S15** 125 MHz  $^{13}\text{C}$  NMR spectrum of **2** in  $\text{CDCl}_3$

**Figure S16** 125 MHz DEPT NMR spectrum of **2** in  $\text{CDCl}_3$

**Figure S17** 500 MHz HSQC NMR spectrum of **2** in  $\text{CDCl}_3$

**Figure S18** 500 MHz  $^1\text{H}$ - $^1\text{H}$  COSY NMR spectrum of **2** in  $\text{CDCl}_3$

**Figure S19** 500 MHz HMBC NMR spectrum of **2** in  $\text{CDCl}_3$

**Figure S20** 500 MHz NOESY NMR spectrum of **2** in  $\text{CDCl}_3$

**Figure S21** HRESIMS spectrum of **3**

**Figure S22** IR spectrum of **3**

**Figure S23** 500 MHz  $^1\text{H}$  NMR spectrum of **3** in  $\text{CD}_3\text{OD}$

**Figure S24** 125 MHz  $^{13}\text{C}$  NMR spectrum of **3** in  $\text{CD}_3\text{OD}$

**Figure S25** 125 MHz DEPT NMR spectrum of **3** in  $\text{CD}_3\text{OD}$

**Figure S26** 500 MHz HSQC NMR spectrum of **3** in  $\text{CD}_3\text{OD}$

**Figure S27** 500 MHz  $^1\text{H}$ - $^1\text{H}$  COSY NMR spectrum of **3** in  $\text{CD}_3\text{OD}$

**Figure S28** 500 MHz HMBC NMR spectrum of **3** in  $\text{CD}_3\text{OD}$

**Figure S29** 500 MHz NOESY NMR spectrum of **3** in  $\text{CD}_3\text{OD}$

**Figure S30** Single X-ray crystal structure and Packing diagram of **3**

**Crystallographic data of Valeriadimer A (1)**

**Crystallographic data of Valeriadimer C (3)**

---

## Experimental section

### General Experimental Procedures.

**General.** Optical rotations were obtained with a Perkin-Elmer 341 polarimeter. IR spectra were recorded with a Bruker FTIR Vector 22 spectrometer.  $^1\text{H}$  and  $^{13}\text{C}$  NMR spectra were recorded on a Bruker Avance-500 spectrometer (**1**, **2** in  $\text{CDCl}_3$  and **3** in  $\text{CD}_3\text{OD}$ ). HRESIMS were measured on an Agilent LC/MSD Trap XCT mass spectrometer. Materials for column chromatography were silica gel (200-300 mesh; Huiyou Silica Gel Development Co., Ltd.), Sephadex LH-20 (40-70  $\mu\text{m}$ ; Pharmacia Co., Ltd.), and YMC-Gel ODS-A (50  $\mu\text{m}$ ; YMC, Milford, MA). Preparative TLC (0.4-0.5 mm, 20 $\times$ 20 cm) was conducted with glass precoated silica gel GF<sub>254</sub> (Huiyou Silica Gel Development Co., Ltd.). Spots were visualized under UV light (254 nm) or by spraying with 10%  $\text{H}_2\text{SO}_4$  in 95% EtOH followed by heating. The cell lines (HUVECs) used for the assay were purchased from the Shanghai institute of pharmaceutical industry. MTT was purchased from Sigma Chemical Co. and dimethyl sulfoxide (DMSO) from Merck, Sharp & Dohme, Ltd.

**Plant Material.** The roots of *Valeriana officinalis* var. *latifolia* were collected from Gaopo, Guizhou province in China in July 2007 and authenticated by Prof. Han-min Zhang, Second Military Medical University. A herbarium specimen (NO. 2007-08-18) was deposited in the School of Pharmacy, Second Military Medical University, Shanghai, China.

**Extraction and Isolation:** The dried root powder of *Valeriana officinalis* var. *latifolia* (9.8kg) were extracted with 50 L of 95% ethanol at room temperature (3 $\times$ 24 h). The EtOH solution was filtered and concentrated under reduced pressure to yield crude extract, which was suspended in  $\text{H}_2\text{O}$  (2.5 L) and partitioned successively with  $\text{CHCl}_3$  (5 $\times$ 2.5 L) and EtOAc (2 $\times$ 2.5 L), respectively. The  $\text{CHCl}_3$  extract (307 g) was subjected to silica gel column chromatography, eluted with a step gradient of petroleum ether-acetone (from 100: 0 to 0:100), to afford 15 fractions (1-15). Fr.5 (9.0 g) was submitted a ODS CC( $\text{CH}_3\text{OH}$ - $\text{H}_2\text{O}$  , 40-100%) , and purified by preparative TLC ( $\text{CHCl}_3$ - EtOAc, 10:1) to yield **1** (16.1 mg) and **2** (28.2 mg). Fr.9 (1.2 g) was purified by silica gel column chromatography ( $\text{CHCl}_3$ -  $\text{Me}_2\text{CO}$  , 4:1) to yield **3** (20.7 mg).

**Valeriadimer A (1)** Orthorhombic crystal;  $[\alpha]_{\text{D}}^{25} +2.36$  (c 0.12,  $\text{CH}_3\text{OH}$ ); IR (KBr)  $\nu_{\text{max}}$  2942,

---

2920, 1711, 1456, 1381 $\text{cm}^{-1}$ ;  $^1\text{H}$  NMR and  $^{13}\text{C}$  NMR data see **Table S1**; ESI-MS  $m/z$ : 411  $[\text{M}+\text{H}]^+$ , 433  $[\text{M}+\text{Na}]^+$ , 445  $[\text{M}+\text{Cl}]^-$ ; HRESIMS  $m/z$ : 433.3113  $[\text{M}+\text{Na}]^+$  (calcd. for  $\text{C}_{28}\text{H}_{42}\text{O}_2$ , 433.3083).

**Valeriadimer B (2)** colorless oil;  $[\alpha]_{\text{D}}^{25}$  +41.7 (c 0.20,  $\text{CH}_3\text{OH}$ ); IR (KBr)  $\nu_{\text{max}}$  2924, 2866, 1705, 1628, 1452, 1382, 1300, 1259, 1176 $\text{cm}^{-1}$ ;  $^1\text{H}$  NMR and  $^{13}\text{C}$  NMR data see **Table S2**; ESI-MS  $m/z$ : 455  $[\text{M}+\text{H}]^+$ , 477  $[\text{M}+\text{Na}]^+$ , 489  $[\text{M}+\text{Cl}]^-$ ; HRESIMS  $m/z$ : 455.3154  $[\text{M}+\text{H}]^+$  (calcd. for  $\text{C}_{29}\text{H}_{42}\text{O}_4$ , 455.3156).

**Valeriadimer C (3)** Orthorhombic crystal;  $[\alpha]_{\text{D}}^{25}$  -30.0 (c 0.35,  $\text{CH}_3\text{OH}$ ); IR (KBr)  $\nu_{\text{max}}$  3573, 3512, 3354, 2978, 2927, 1460, 1379, 1147, 1084  $\text{cm}^{-1}$ ;  $^1\text{H}$  NMR and  $^{13}\text{C}$  NMR data see **Table S3**; ESI-MS  $m/z$ : 505  $[\text{M}+\text{H}]^+$ , 527  $[\text{M}+\text{Na}]^+$ , 503  $[\text{M}-\text{H}]^-$ ; HRESIMS  $m/z$ : 527.3458  $[\text{M}+\text{H}]^+$  (calcd. for  $\text{C}_{30}\text{H}_{48}\text{O}_6$ , 527.3451).

#### Cell Viability Assays.

HUVECs ( $4 \times 10^4 \sim 6 \times 10^4$  cells/well) were seeded into 96-well plates in RPMI 1640 containing 10% FBS. After attachment, the medium was replaced with RPMI 1640 containing 3% FBS. Cells were treated with **1**, **2**, and **3** for 48 h, respectively. Cell viability was determined by 3-(4,5-dimethylthiazol-2-yl) 2,5-diphenyltetrazolium bromide, which is converted to formazan in surviving cells. The formazan was dissolved in 10% SDS–5% iso-butanol–0.01 M HCl. Optical density was measured ( three times) at 570 nm with 630 nm as the reference and cell viability was normalized as the percentage of control.<sup>1</sup>

#### References and Notes

1 K. K. Shen, L. L. Ji, C. Y. Gong, Y. B. Ma, L. Yang, Y. Fan, M. Q. Hou, Z. T. Wang, *Biochem. Pharmacol*, 2012, **84**, 784 – 792.

**Table S1.**  $^1\text{H}$  NMR and  $^{13}\text{C}$  NMR Data of **1** ( $\delta$  in ppm,  $J$  in Hz)

**1**

| No | $\delta_{\text{H}}$ mult. ( <i>J</i> in Hz) | $\delta_{\text{C}}$ | No  | $\delta_{\text{H}}$ mult. ( <i>J</i> in Hz) | $\delta_{\text{C}}$ |
|----|---------------------------------------------|---------------------|-----|---------------------------------------------|---------------------|
| 1  | 3.09 (dd, 11.0, 2.0)                        | 64.7 d              | 1'  | 2.64 (dd, 13.0, 4.0)                        | 42.4 d              |
| 2a | 2.13 (m)                                    | 28.7 t              | 2'a | 2.00 (m)                                    | 29.1 t              |
| 2b | 1.37 (overlap)                              |                     | 2'b | 1.86 (m)                                    |                     |
| 3a | 2.75 (m)                                    | 31.4 t              | 3'a | 2.83 (dt, 7.5, 14.0)                        | 39.0 t              |
| 3b | 2.17 (m)                                    |                     | 3'b | 2.27(m)                                     |                     |
| 4  |                                             | 142.2 s             | 4'  |                                             | 215.7 s             |
| 5  | 5.03 (d, 8.3)                               | 126.2 d             | 5'  | 1.78 (dd, 5.0, 1.5)                         | 55.7 d              |
| 6  | 1.37 (overlap)                              | 28.7 d              | 6'  | 0.52 (dd, 9.0, 5.0)                         | 23.6 d              |
| 7  | 0.59,(dt, 1.5, 10.0)                        | 35.3 d              | 7'  | 0.80 (t, 9.0)                               | 18.6 d              |
| 8a | 1.80 (m)                                    | 22.4 t              | 8'a | 2.05 (m)                                    | 17.1 t              |
| 8b | 0.95(overlap)                               |                     | 8'b | 1.60 (dd, 16.0, 8.0)                        |                     |
| 9a | 2.12 (m)                                    | 41.1 t              | 9'a | 1.34 (m)                                    | 33.5 t              |
| 9b | 1.07 (overlap)                              |                     | 9'b | 0.69 (m)                                    |                     |
| 10 |                                             | 61.9 s              | 10' |                                             | 39.3 s              |
| 11 |                                             | 21.3 s              | 11' |                                             | 19.5 s              |
| 12 | 1.08 (s)                                    | 30.0 q              | 12' | 0.95 (s)                                    | 16.3 q              |
| 13 | 1.01 (s)                                    | 16.6 q              | 13' | 1.03 (s)                                    | 29.9 q              |
| 14 | 1.12 (s)                                    | 19.4 q              | 14' | 0.73 (s)                                    | 23.6 q              |

Data of **1** was recorded at 500 MHz and  $^{13}\text{C}$  NMR spectroscopic at 125 MHz

**Table S2.**  $^1\text{H}$  NMR and  $^{13}\text{C}$  NMR Data of **2** ( $\delta$  in ppm,  $J$  in Hz)

| <b>2</b> |                                        |                     |     |                                        |                     |
|----------|----------------------------------------|---------------------|-----|----------------------------------------|---------------------|
| N        | $\delta_{\text{H}}$ mult. ( $J$ in Hz) | $\delta_{\text{C}}$ | No  | $\delta_{\text{H}}$ mult. ( $J$ in Hz) | $\delta_{\text{C}}$ |
| 1        | 2.99 (dd, 11.5, 3.5)                   | 63.8 d              | 1'  | 5.48 (dd, 11.5, 5.0)                   | 71.2 d              |
| 2a       | 2.27 (m)                               | 28.7 t              | 2'a | 2.16 (overlap)                         | 26.9 t              |
| 2b       | 1.37 (m)                               |                     | 2'b | 1.83 (overlap)                         |                     |
| 3a       | 2.72 (dt, 14.0, 3.5)                   | 24.1 t              | 3'a | 2.92 (dt, 7.0, 14.5)                   | 36.8 t              |
| 3b       | 2.17 (m)                               |                     | 3'b | 2.33(m)                                |                     |
| 4        |                                        | 133.1 s             | 4'  |                                        | 213.4 s             |
| 5        | 6.88 (d, 9.5)                          | 144.4 d             | 5'  | 1.94 (dd, 4.5, 2.0)                    | 54.3 d              |
| 6        | 1.48 (overlap)                         | 29.5 d              | 6'  | 0.48 (dd, 8.5, 4.5)                    | 22.9 d              |
| 7        | 0.94,( overlap)                        | 38.2 d              | 7'  | 0.80 (overlap)                         | 19.6 d              |
| 8a       | 1.88 (m)                               | 23.0 t              | 8'a | 1.81 (overlap)                         | 16.2 t              |
| 8b       | 1.10 (overlap)                         |                     | 8'b | 1.55 (dd, 15.0, 6.5)                   |                     |
| 9a       | 2.17 (overlap)                         | 41.1 t              | 9'a | 1.46 (m)                               | 31.9 t              |
| 9b       | 1.10 (overlap)                         |                     | 9'b | 0.76 (m)                               |                     |
| 10       |                                        | 61.4 s              | 10' |                                        | 38.0 s              |
| 11       |                                        | 23.9 s              | 11' |                                        | 19.7 s              |
| 12       | 1.14 (s)                               | 29.3 q              | 12' | 0.97 (s)                               | 16.2 q              |
| 13       | 1.19 (s)                               | 16.4 q              | 13' | 1.00 (s)                               | 30.2 q              |
| 14       | 0.99 (s)                               | 18.2 q              | 14' | 0.92 (s)                               | 22.1 q              |
| 15       |                                        | 167.7 s             |     |                                        |                     |

Data of **2** were recorded in  $\text{CDCl}_3$  at 500 MHz for  $^1\text{H}$  and 125 MHz for  $^{13}\text{C}$  NMR

**Table S3.**  $^1\text{H}$  NMR and  $^{13}\text{C}$  NMR Data of **3** ( $\delta$  in ppm,  $J$  in Hz)

| <b>3</b> |                                        |                     |     |                                        |                     |
|----------|----------------------------------------|---------------------|-----|----------------------------------------|---------------------|
| N        | $\delta_{\text{H}}$ mult. ( $J$ in Hz) | $\delta_{\text{C}}$ | No  | $\delta_{\text{H}}$ mult. ( $J$ in Hz) | $\delta_{\text{C}}$ |
| 1a       | 1.94 (m)                               | 25.2 t              | 1'a | 1.80 (m)                               | 26.2 t              |
| 1b       | 1.72 (overlap)                         |                     | 1'b | 1.62 (overlap)                         |                     |
| 2a       | 1.72 (overlap)                         | 35.3 t              | 2'a | 1.77 (m)                               | 30.2 t              |
| 2b       | 1.62 (m)                               |                     | 2'b | 1.65 (overlap)                         |                     |
| 3        |                                        | 83.1 s              | 3'  |                                        | 94.0 s              |
| 4        | 1.27 (t, 10.5)                         | 47.9 d              | 4'  | 1.52 (overlap)                         | 46.0 d              |
| 5        | 0.70 (m)                               | 29.5 d              | 5'  | 0.53 (m)                               | 31.4 d              |
| 6        | 0.56 (m)                               | 27.4 s              | 6'  | 0.67 (m)                               | 27.5 s              |
| 7a       | 1.77 (overlap)                         | 20.6 t              | 7'a | 1.77 (overlap)                         | 20.5 t              |
| 7b       | 0.94 (overlap)                         |                     | 7'b | 0.94 (overlap)                         |                     |
| 8a       | 1.72 (overlap)                         | 45.1 t              | 8'a | 1.72 (overlap)                         | 45.0 t              |
| 8b       | 1.53 (overlap)                         |                     | 8'b | 1.53 (overlap)                         |                     |
| 9        |                                        | 75.1 s              | 9'  |                                        | 74.8 s              |
| 10       | 1.94 (m)                               | 59.3 d              | 10' | 1.81 (m)                               | 59.1 d              |
| 11       |                                        | 20.5 s              | 11' |                                        | 20.7 s              |
| 12       | 1.06 (s)                               | 16.3 q              | 12' | 1.05 (s)                               | 16.4 q              |
| 13       | 1.03 (s)                               | 28.7 q              | 13' | 1.04 (s)                               | 28.4 q              |
| 14       | 1.13 (s)                               | 19.7 q              | 14' | 1.14 (s)                               | 20.2 q              |
| 15       | 5.12 (s)                               | 103.0 d             | 15' | 5.40 (s)                               | 98.2 d              |

Data of **3** were recorded in  $\text{CD}_3\text{OD}$  at 500 MHz for  $^1\text{H}$  and 125 MHz for  $^{13}\text{C}$  NMR

**Table S4.** Cell viability of **1**, **2**, and **3** (Mean  $\pm$  SD, n=3)

|                      | <b>1</b>         | <b>2</b>         | <b>3</b>        | <b>VEGF<sup>a</sup></b> | <b>DMSO</b> |
|----------------------|------------------|------------------|-----------------|-------------------------|-------------|
| <b>concentration</b> | 20 $\mu$ M       | 20 $\mu$ M       | 20 $\mu$ M      | 10 ng/mL                |             |
| <b>viability</b>     | 146.8 $\pm$ 3.3% | 140.7 $\pm$ 4.7% | 97.7 $\pm$ 3.4% | 149.5 $\pm$ 1.4%        | 100%        |

<sup>a</sup> positive control



**Figure S1** The chemical structures of **1-3**

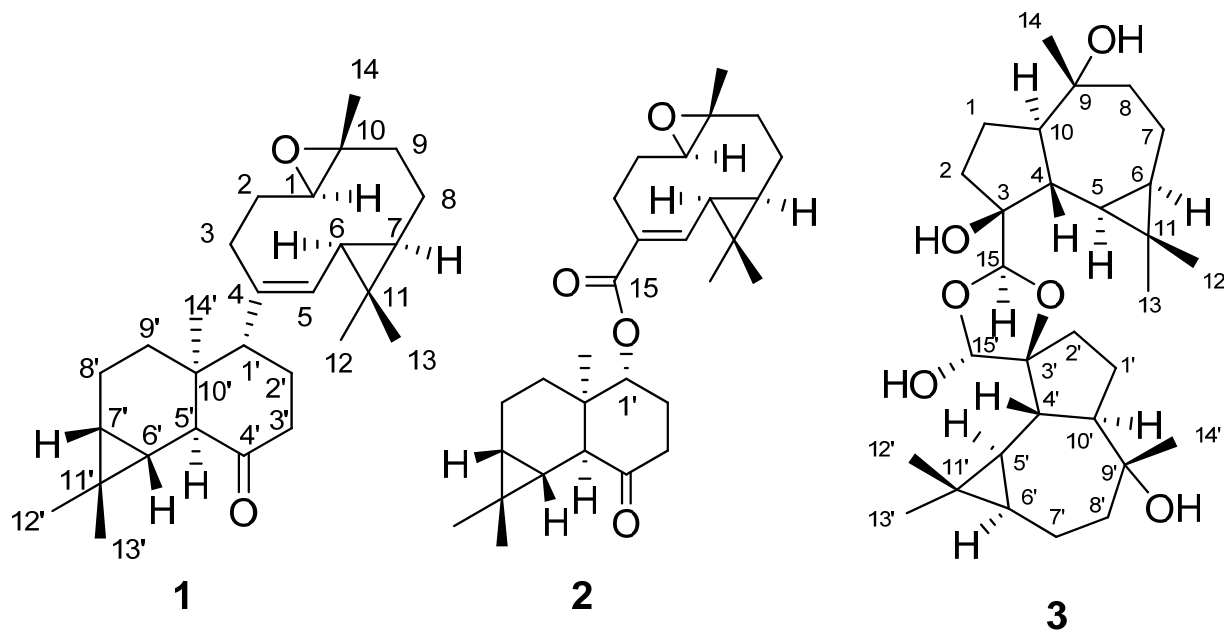

**Figure S2** HRESIMS spectrum of **1**

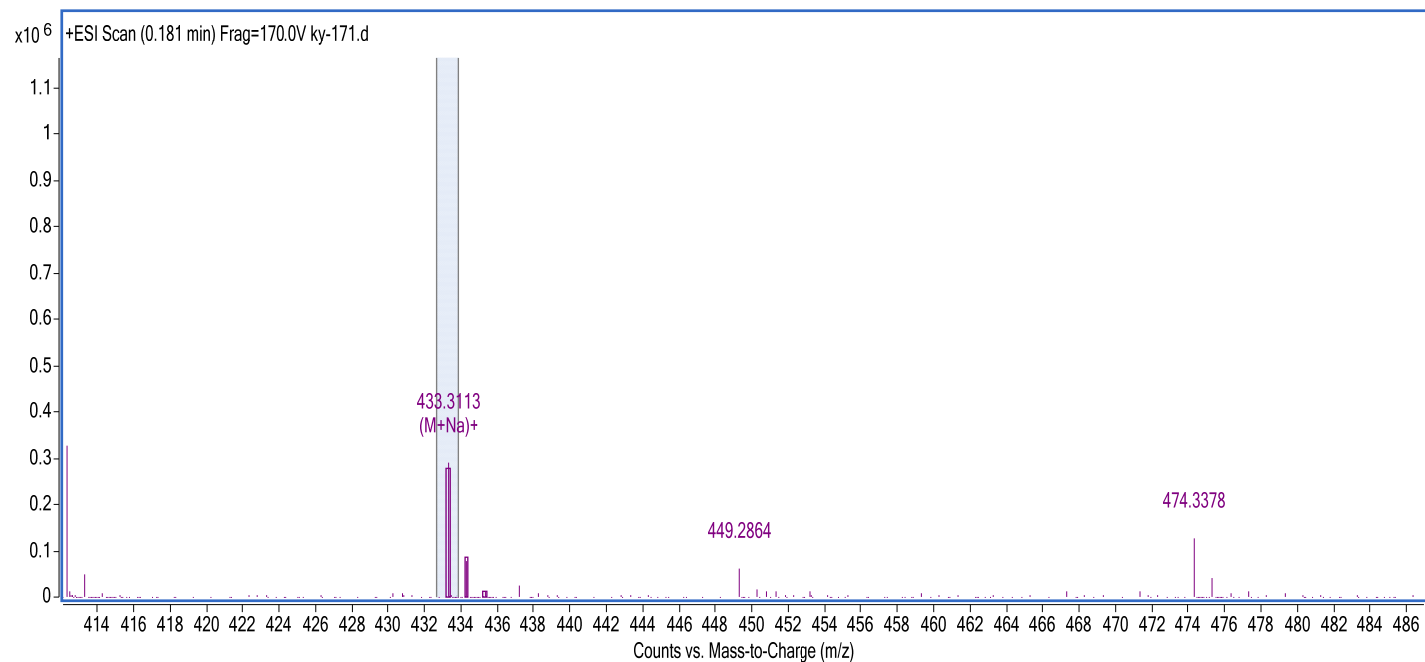

| m/z      |                                                | Ion                                               |          | Formula                                           |             | Abundance |           |
|----------|------------------------------------------------|---------------------------------------------------|----------|---------------------------------------------------|-------------|-----------|-----------|
| 433.3113 |                                                | (M+Na) <sup>+</sup>                               |          | C <sub>28</sub> H <sub>42</sub> Na O <sub>2</sub> |             | 290709    |           |
| Best     | Formula (M)                                    | Ion Formula                                       | Calc m/z | Score                                             | Cross Score | Mass      | Calc Mass |
| TRUE     | C <sub>28</sub> H <sub>42</sub> O <sub>2</sub> | C <sub>28</sub> H <sub>42</sub> Na O <sub>2</sub> | 433.3083 | 85.6                                              |             | 410.3221  | 410.3185  |

Figure S3 IR spectrum of 1

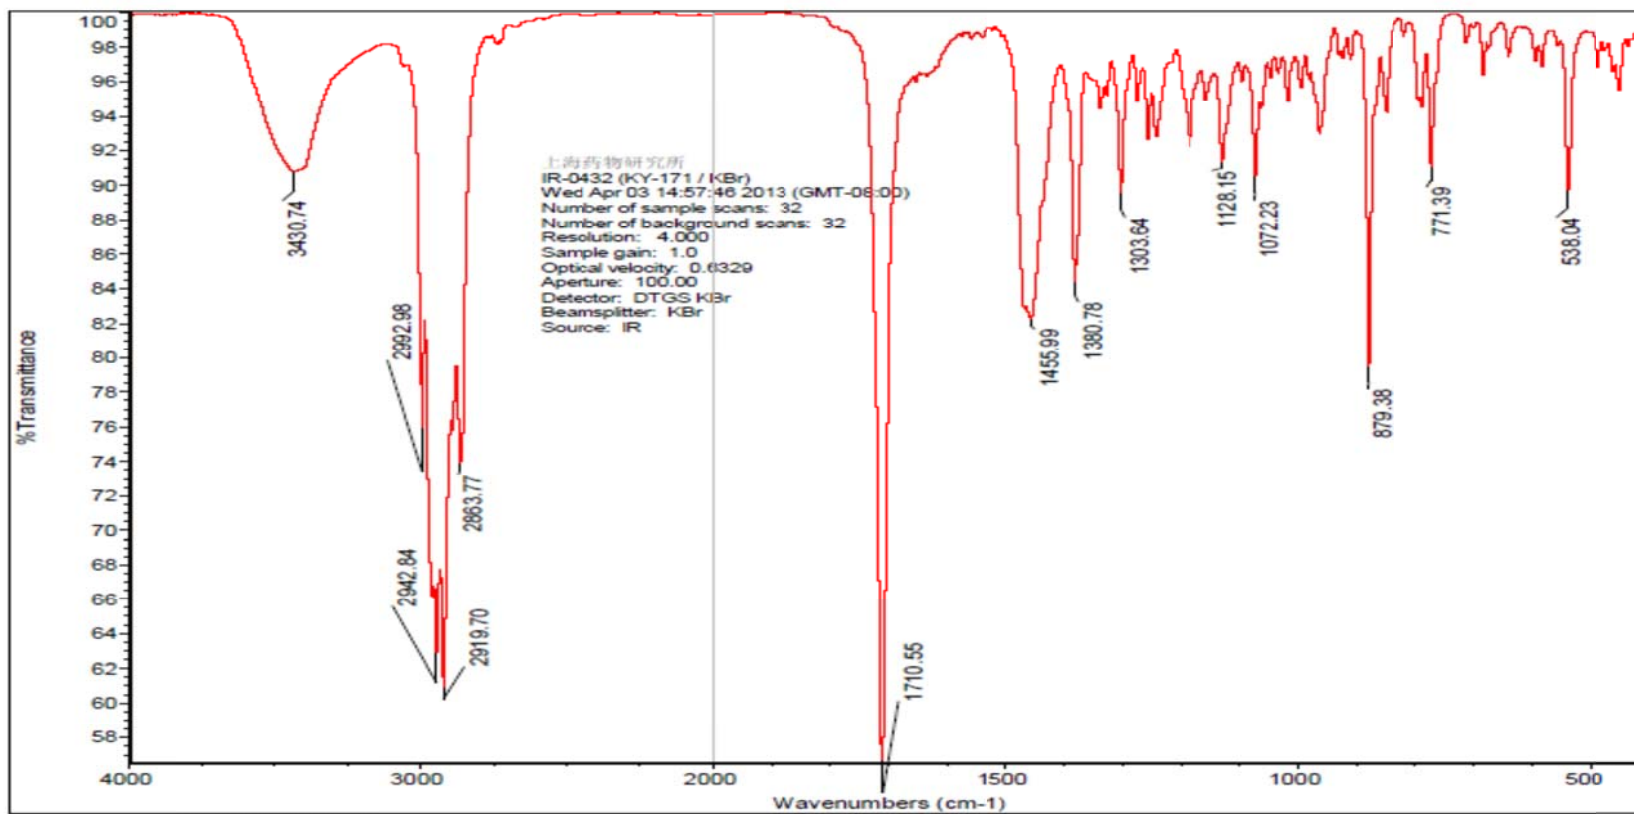

**Figure S4** 500 MHz  $^1\text{H}$  NMR spectrum of **1** in  $\text{CDCl}_3$

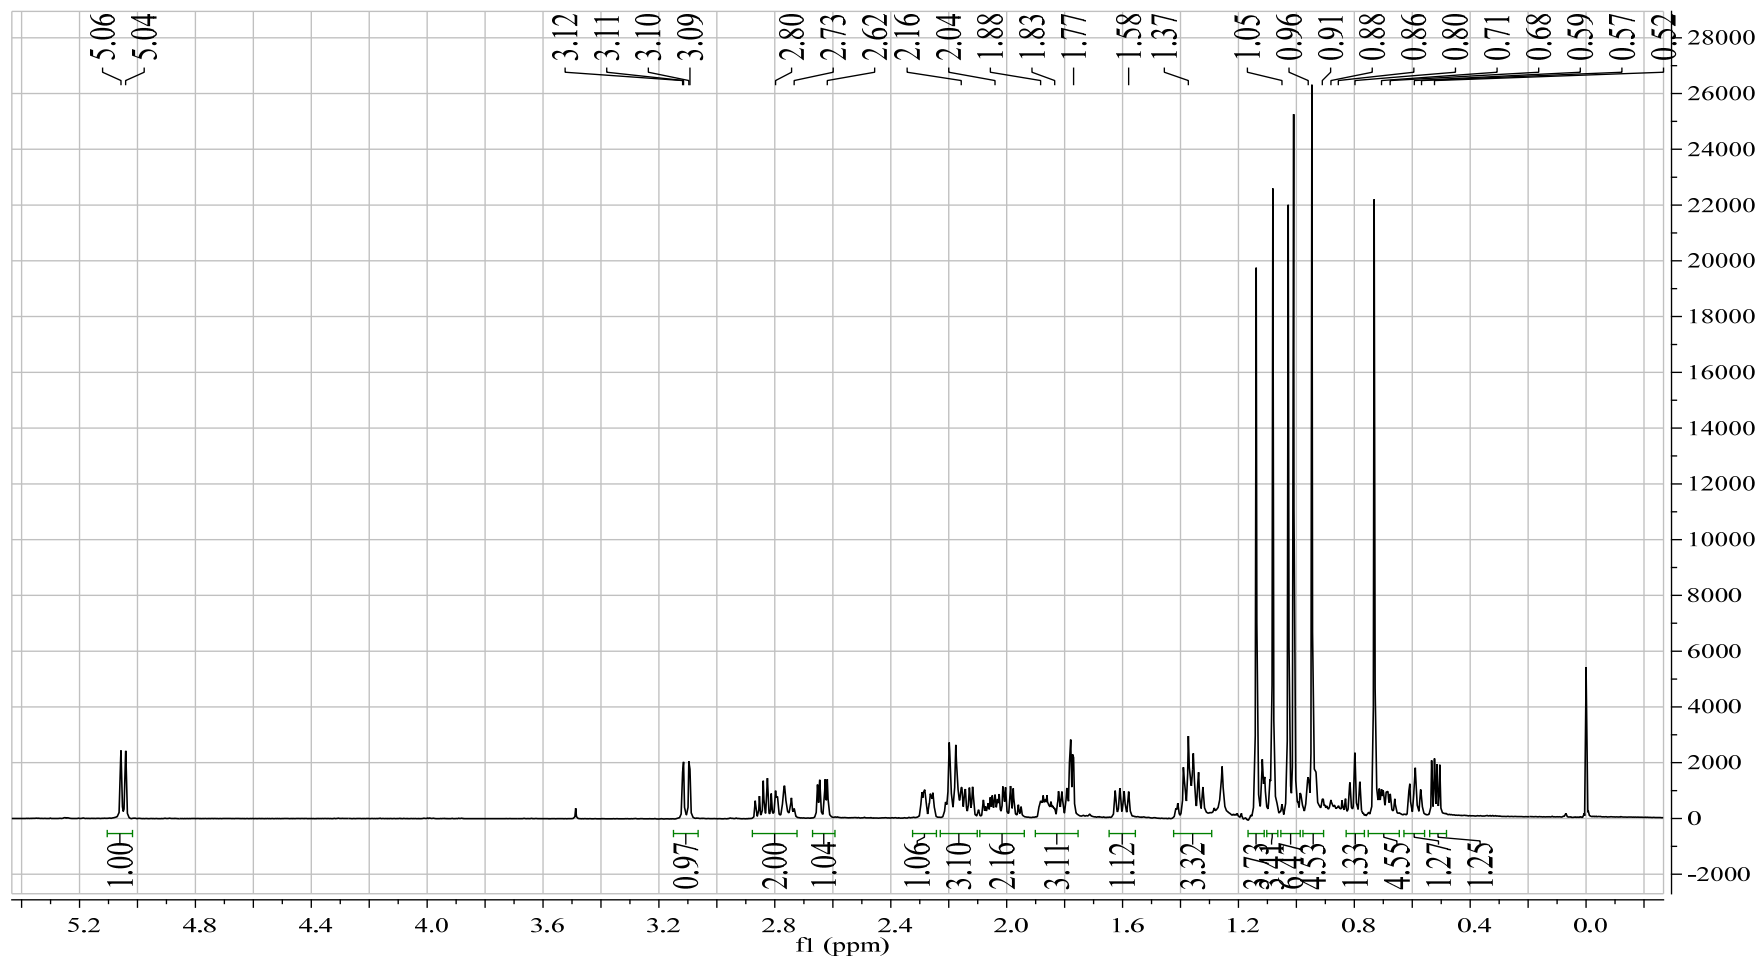

**Figure S5** 125 MHz  $^{13}\text{C}$  NMR spectrum of **1** in  $\text{CDCl}_3$

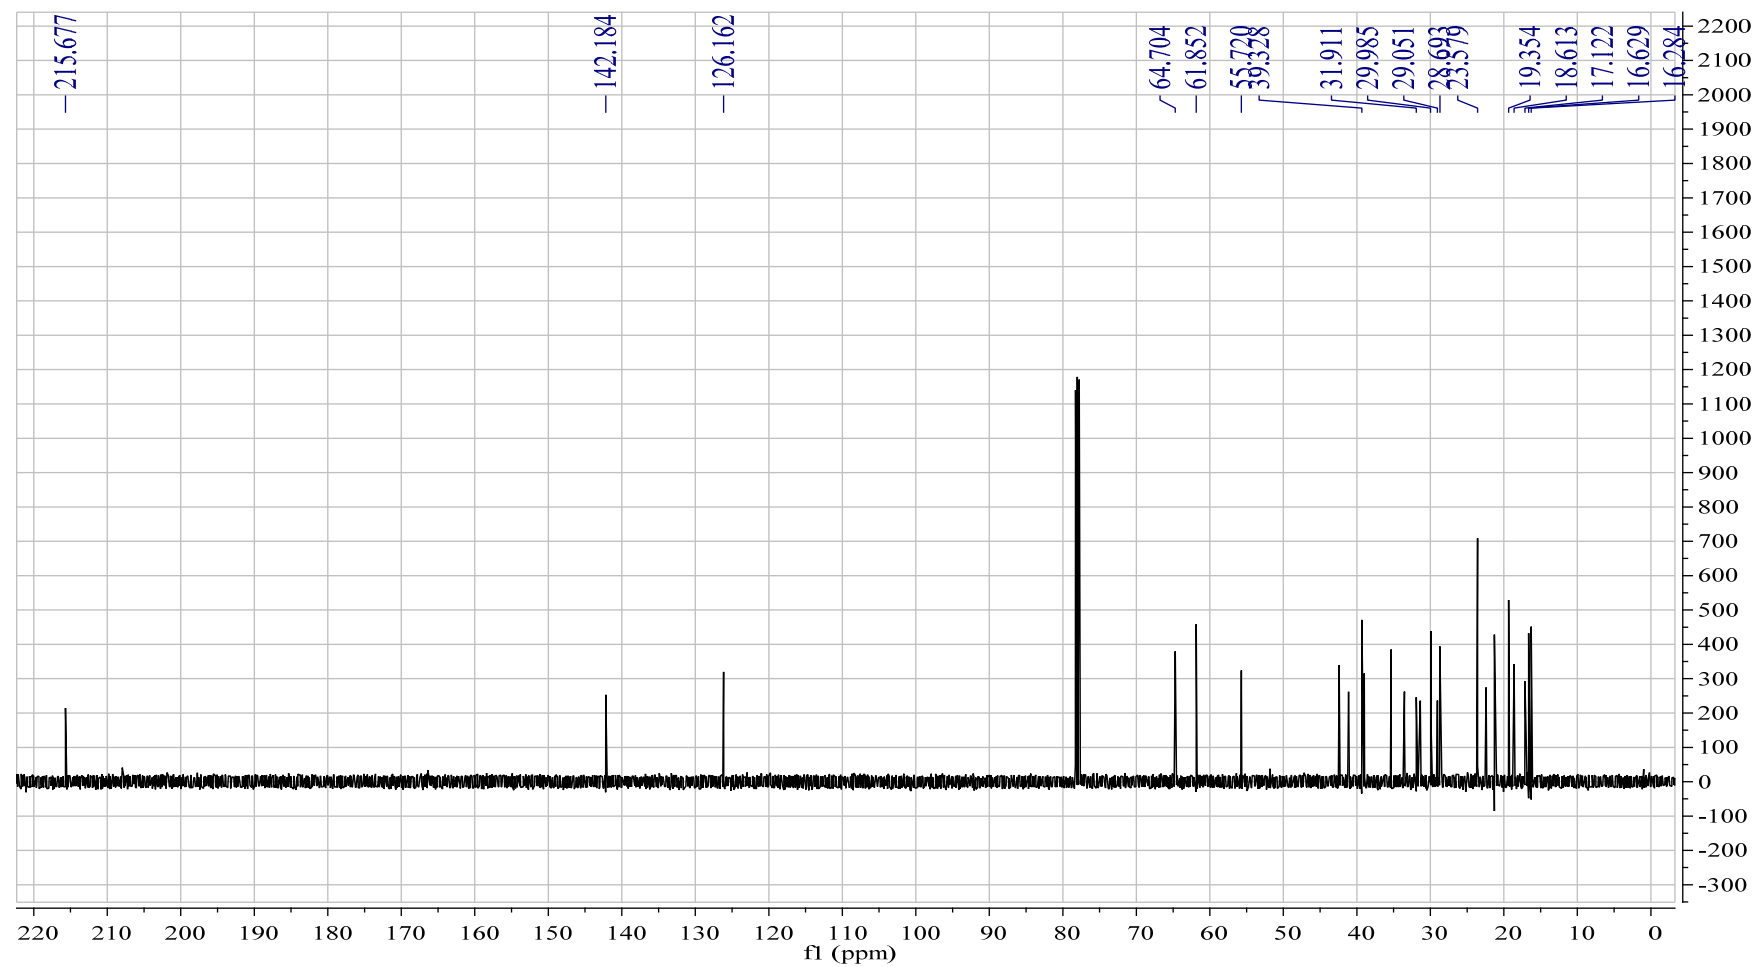

**Figure S6** 125 MHz DEPT NMR spectrum of **1** in CDCl<sub>3</sub>

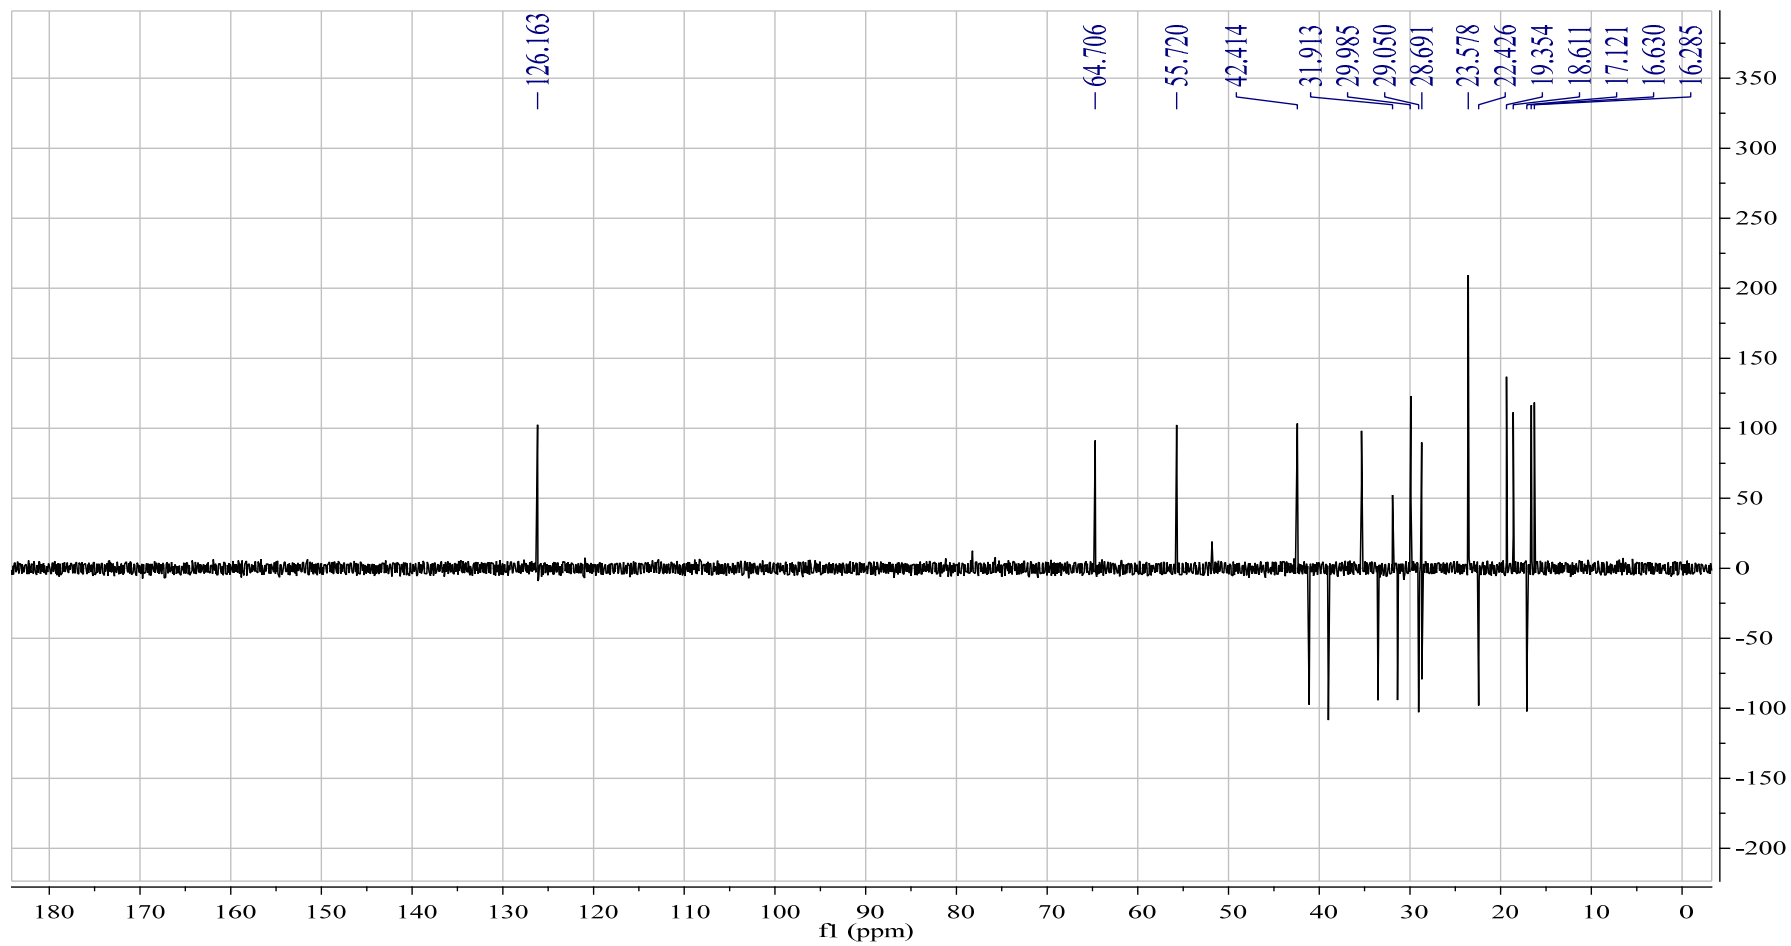

**Figure S7** 500 MHz  $^1\text{H}$ - $^1\text{H}$  COSY NMR spectrum of **1** in  $\text{CDCl}_3$

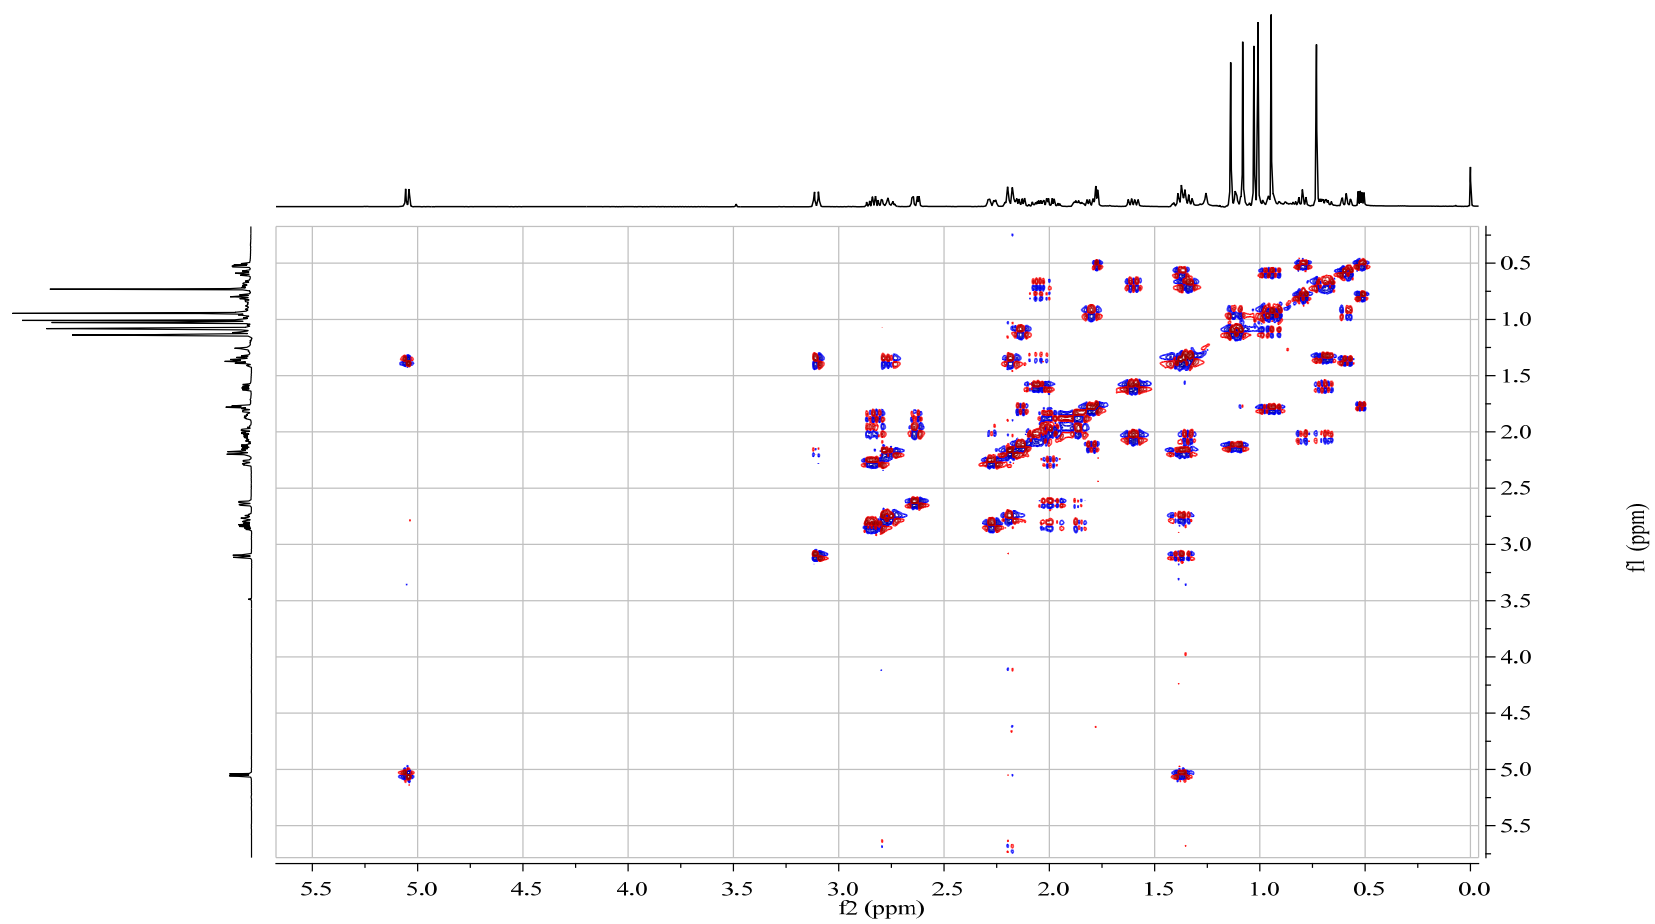

**Figure S8** 500 MHz HSQC NMR spectrum of **1** in CDCl<sub>3</sub>

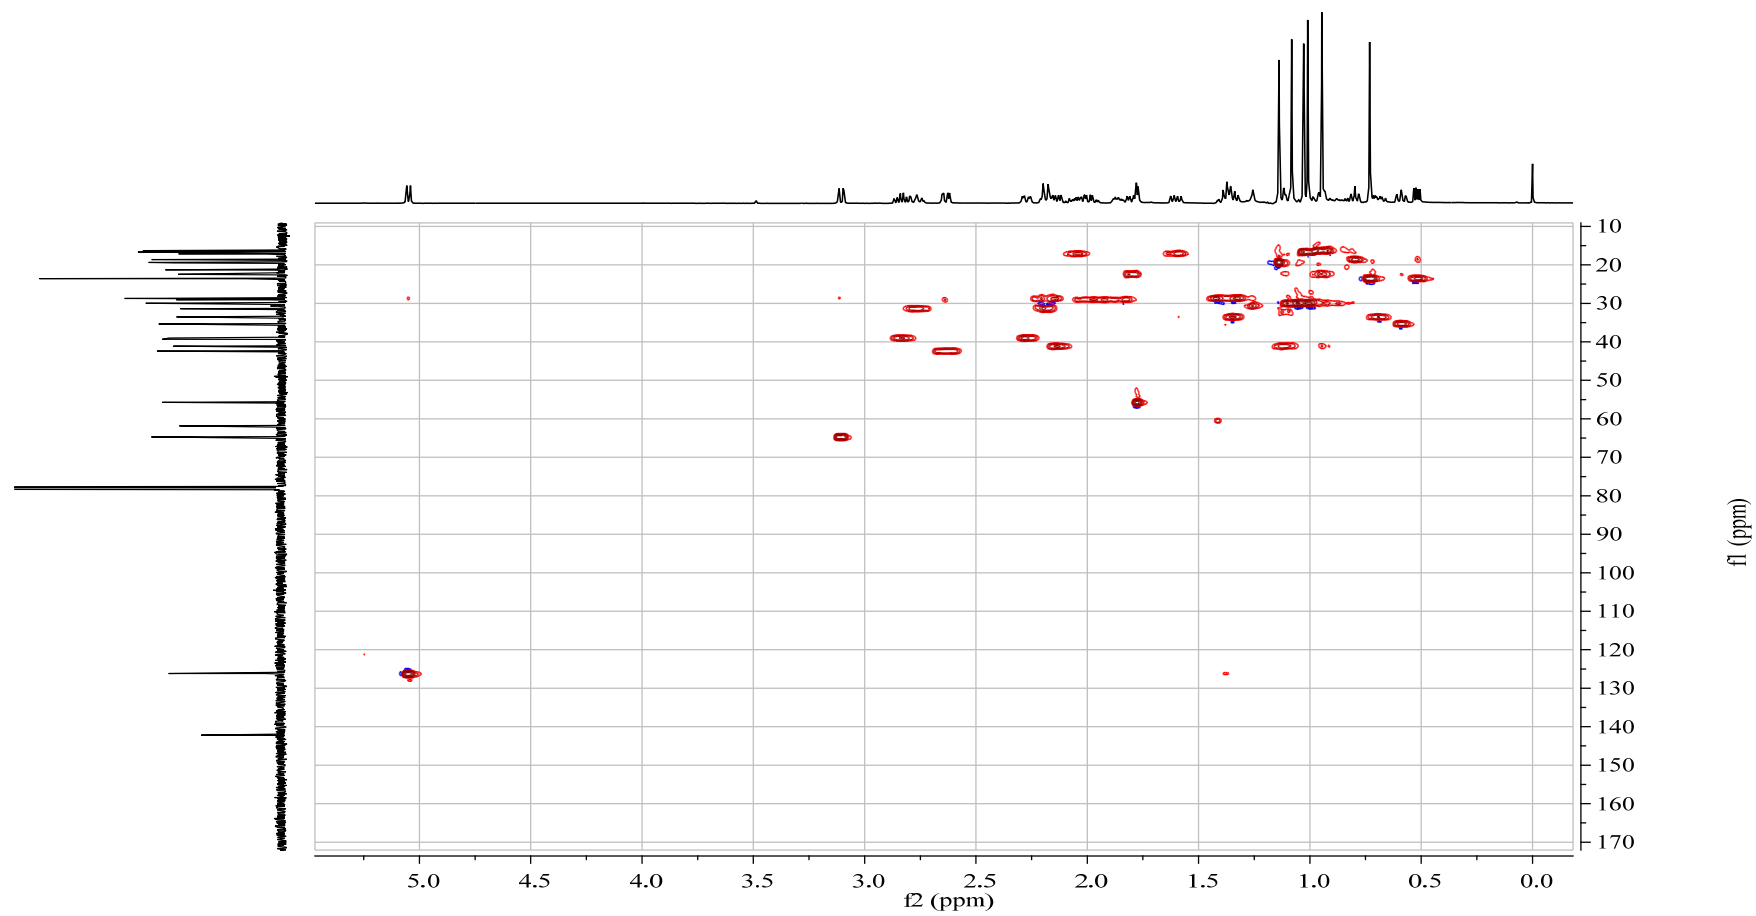



**Figure S9** 500 MHz HMBC NMR spectrum of **1** in CDCl<sub>3</sub>

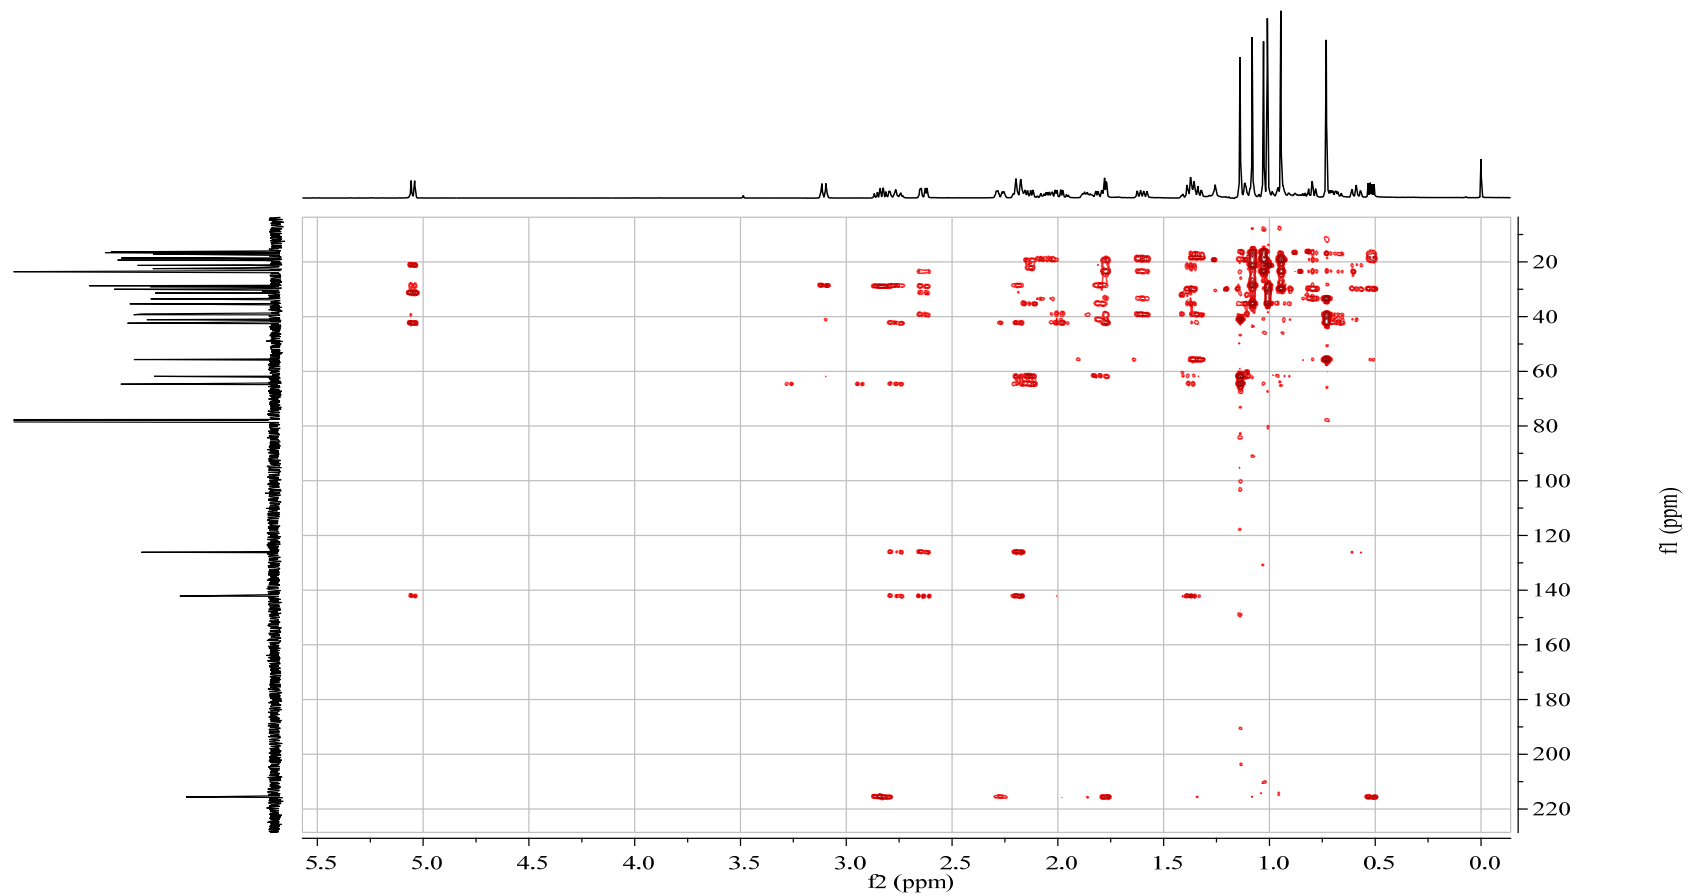

**Figure S10** 500 MHz NOESY NMR spectrum of **1** in CDCl<sub>3</sub>

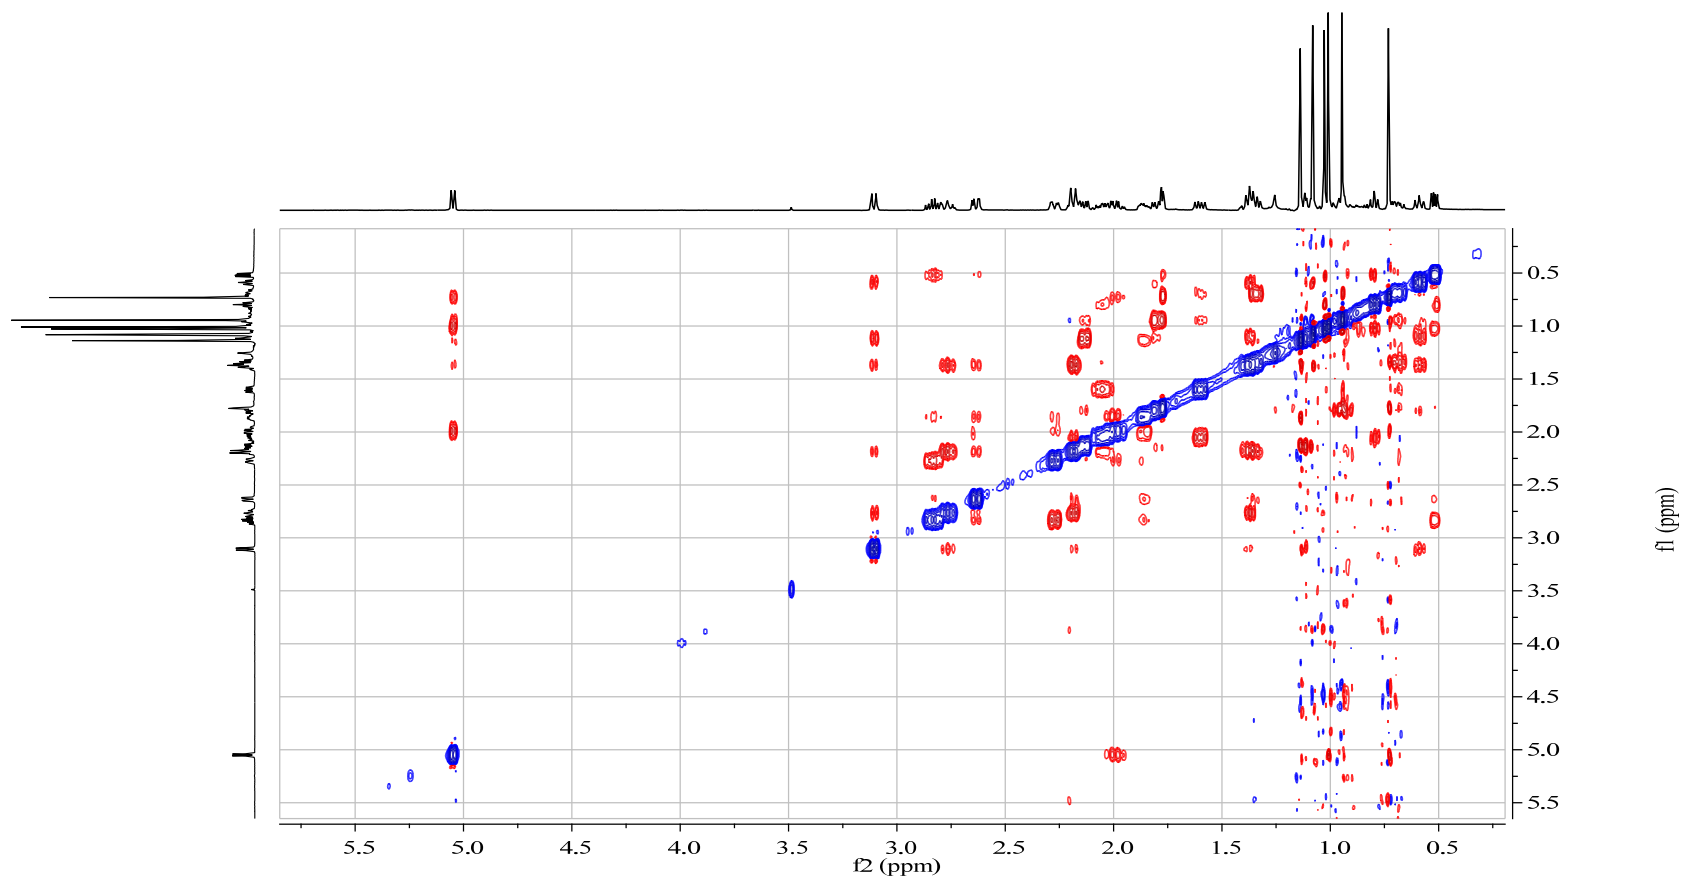

**Figure S11** Single X-ray crystal structure and Packing diagram of **1**

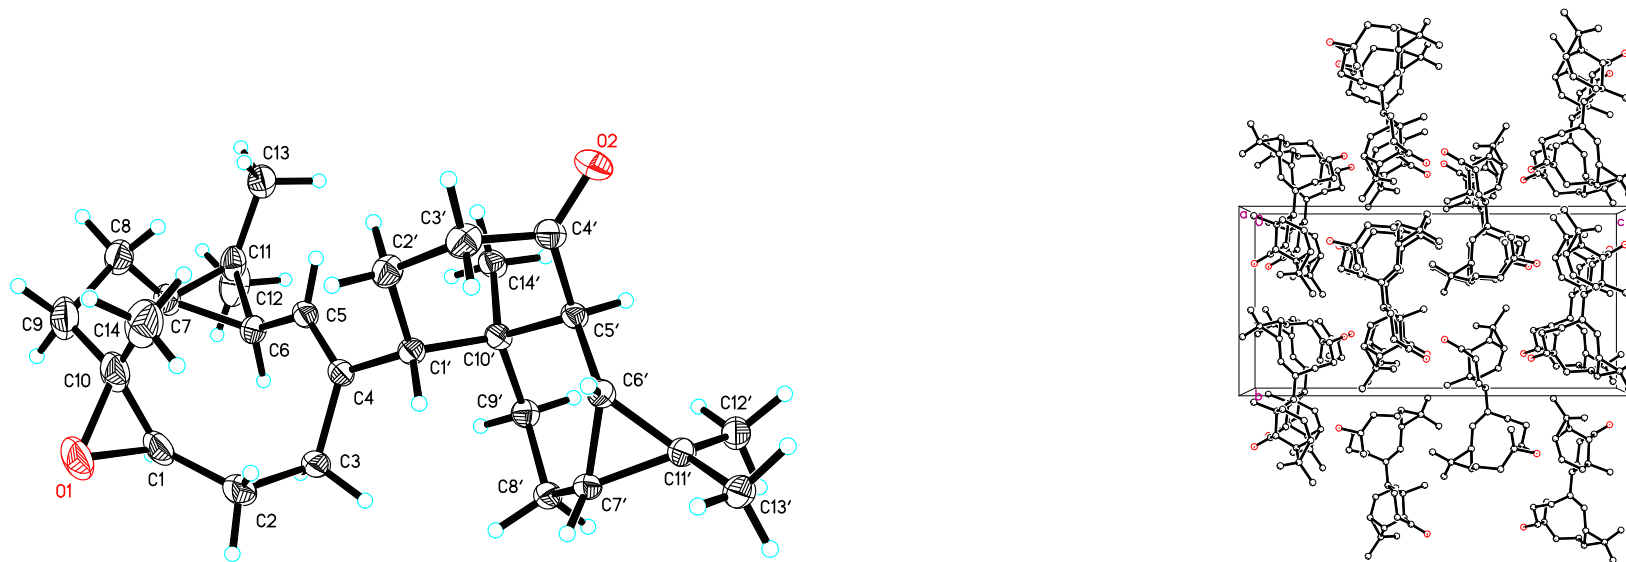

**Figure S12** HRESIMS spectrum of **2**

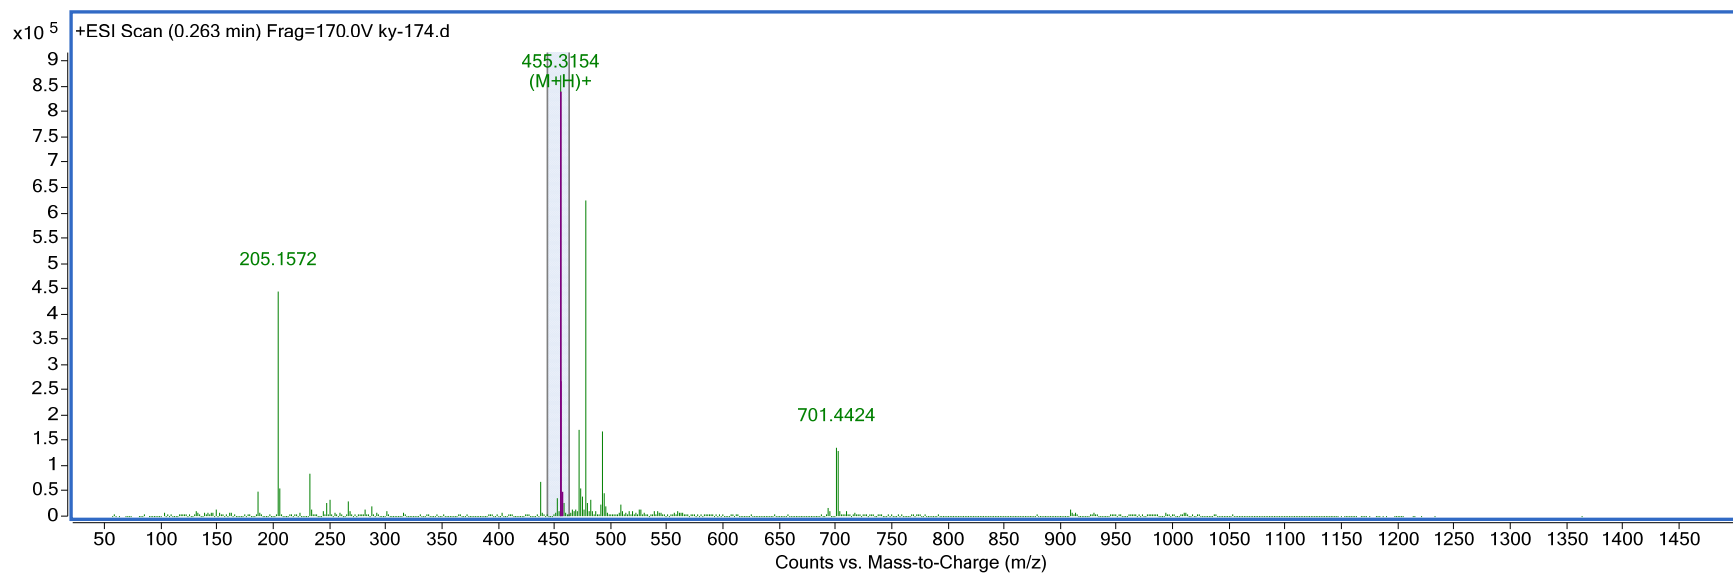

| m/z      | Ion    | Formula                                        | Abundance |
|----------|--------|------------------------------------------------|-----------|
| 455.3154 | (M+H)+ | C <sub>29</sub> H <sub>43</sub> O <sub>4</sub> | 873452.3  |

| Best | Formula (M)                                    | Ion Formula                                    | Calc m/z | Score | Cross Score | Mass     | Calc Mass | Diff (ppm) | Abs Diff (ppm) | Abund Match | Spacing Match | Mass Match | m/z      |
|------|------------------------------------------------|------------------------------------------------|----------|-------|-------------|----------|-----------|------------|----------------|-------------|---------------|------------|----------|
| TRUE | C <sub>29</sub> H <sub>42</sub> O <sub>4</sub> | C <sub>29</sub> H <sub>43</sub> O <sub>4</sub> | 455.3156 | 97.39 |             | 454.3081 | 454.3083  | 0.5        | 0.5            | 91.6        | 99.63         | 99.75      | 455.3154 |

Figure S13 IR spectrum of 2

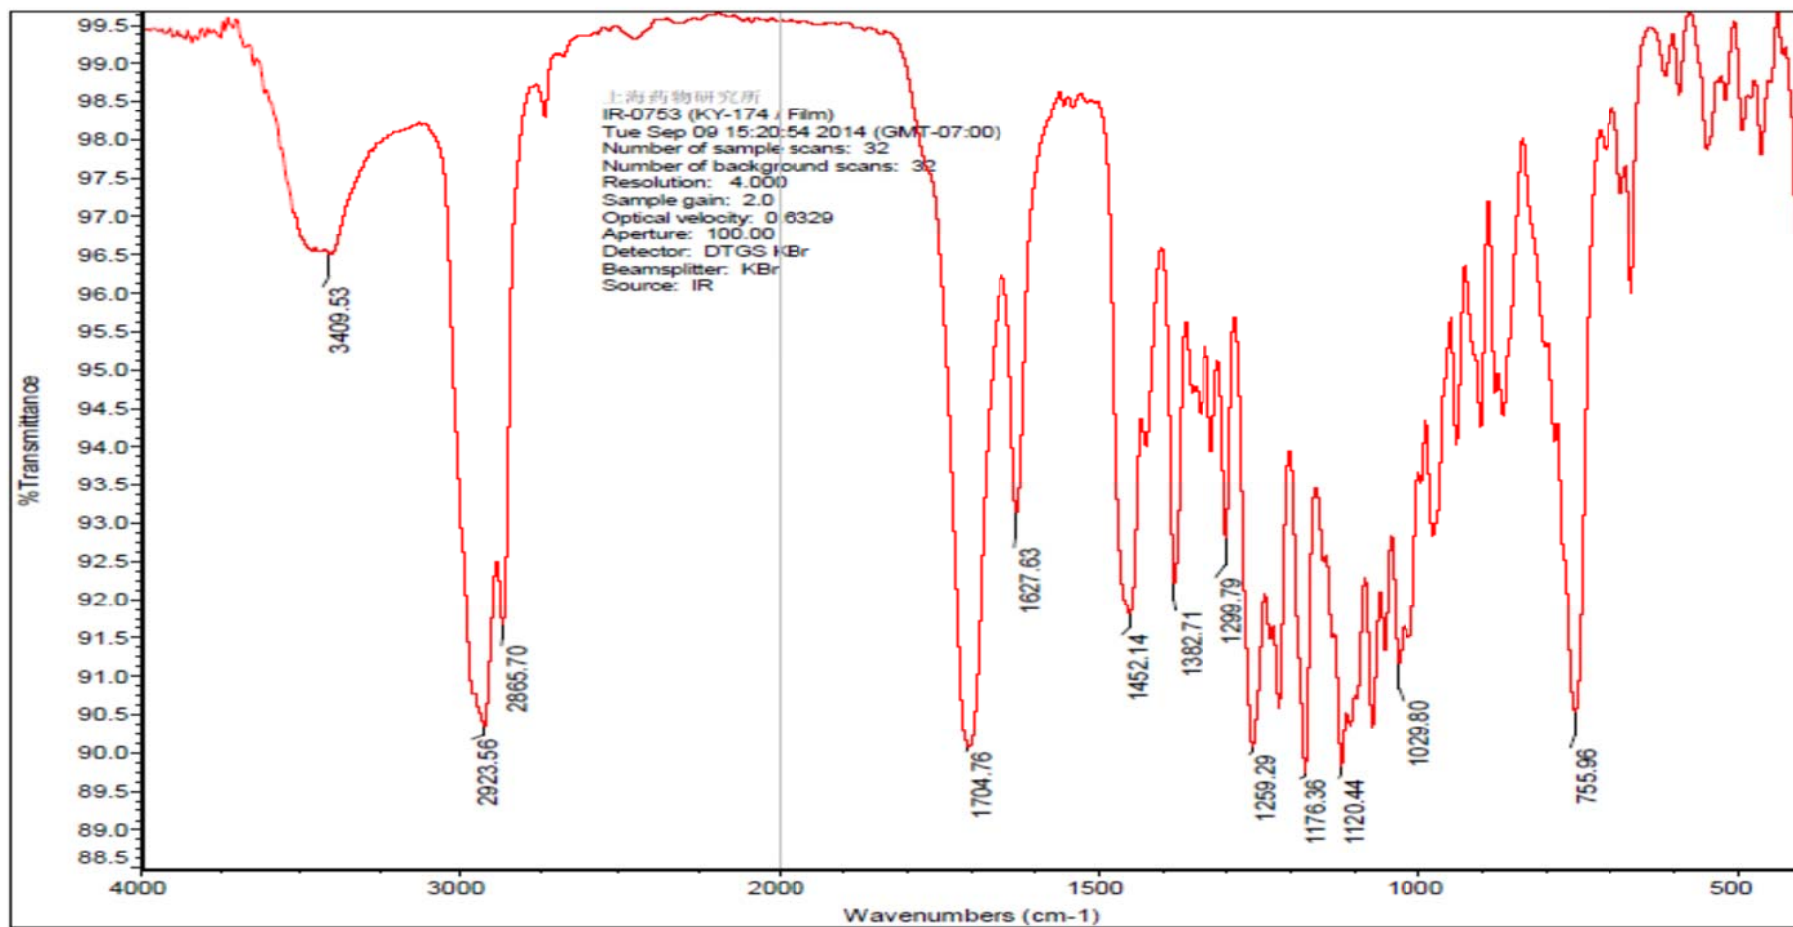

**Figure S14** 500 MHz  $^1\text{H}$  NMR spectrum of **2** in  $\text{CDCl}_3$

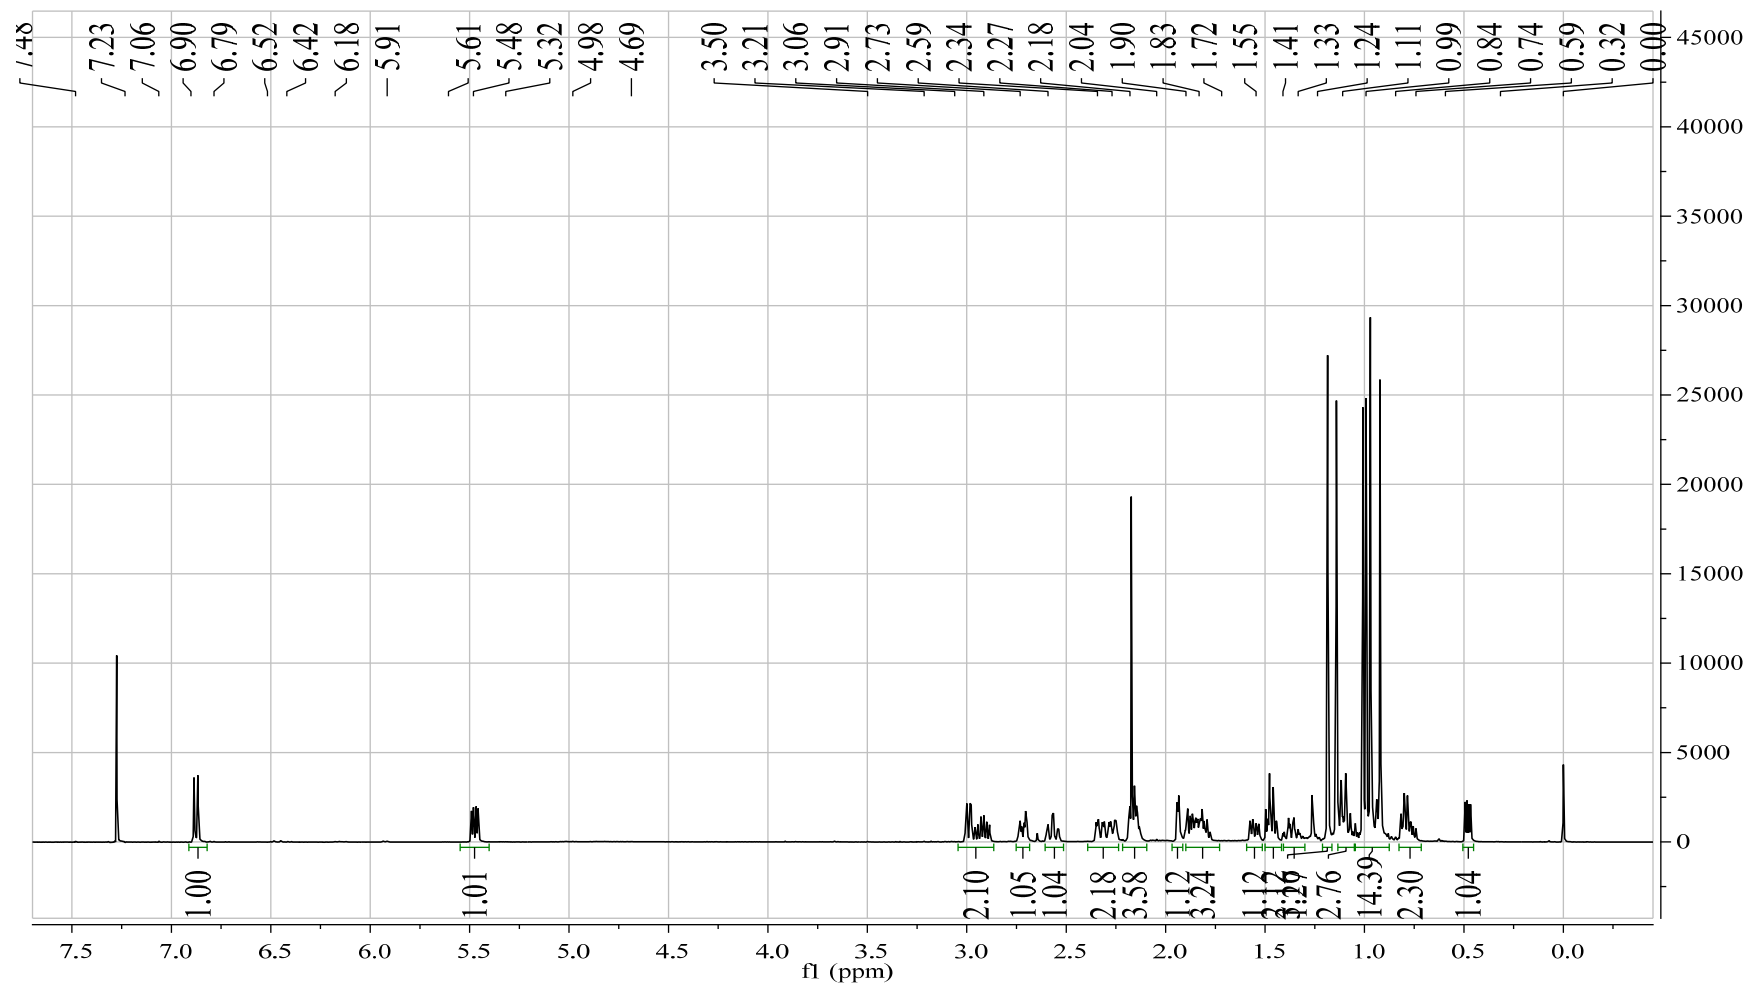

**Figure S15** 125 MHz  $^{13}\text{C}$  NMR spectrum of **2** in  $\text{CDCl}_3$

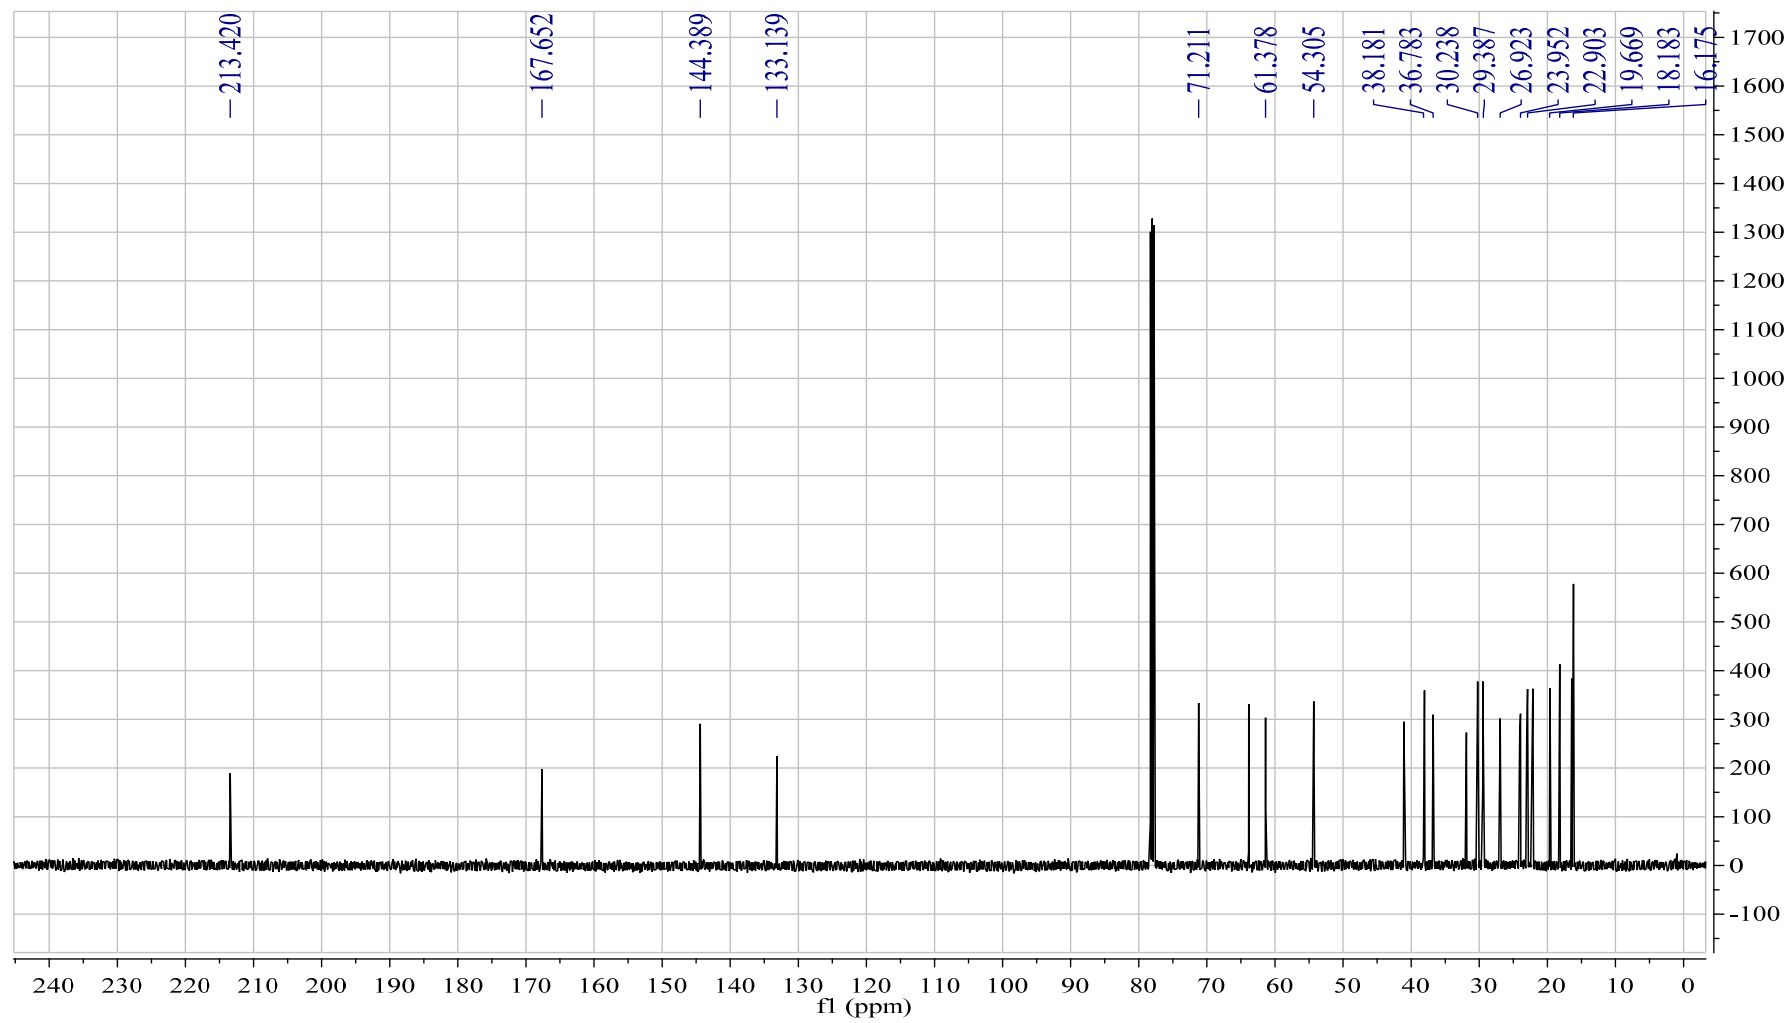

**Figure S16** 125 MHz DEPT NMR spectrum of **2** in CDCl<sub>3</sub>

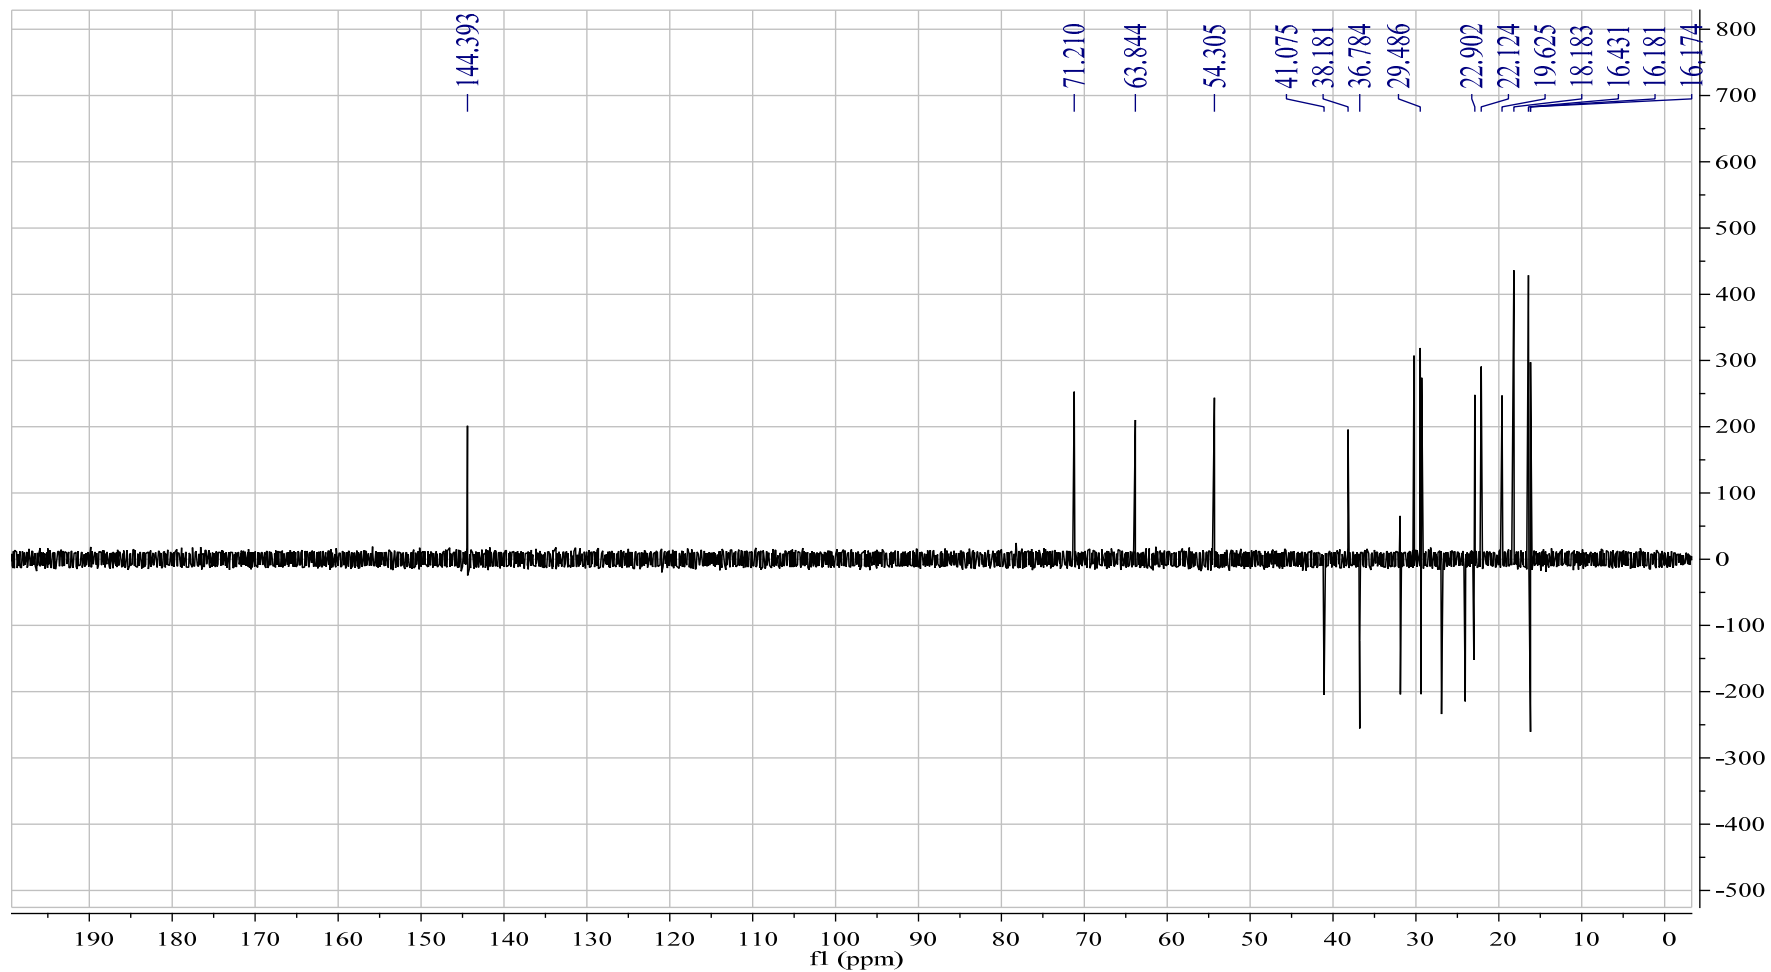



**Figure S17** 500 MHz  $^1\text{H}$ - $^1\text{H}$  COSY NMR spectrum of **2** in  $\text{CDCl}_3$

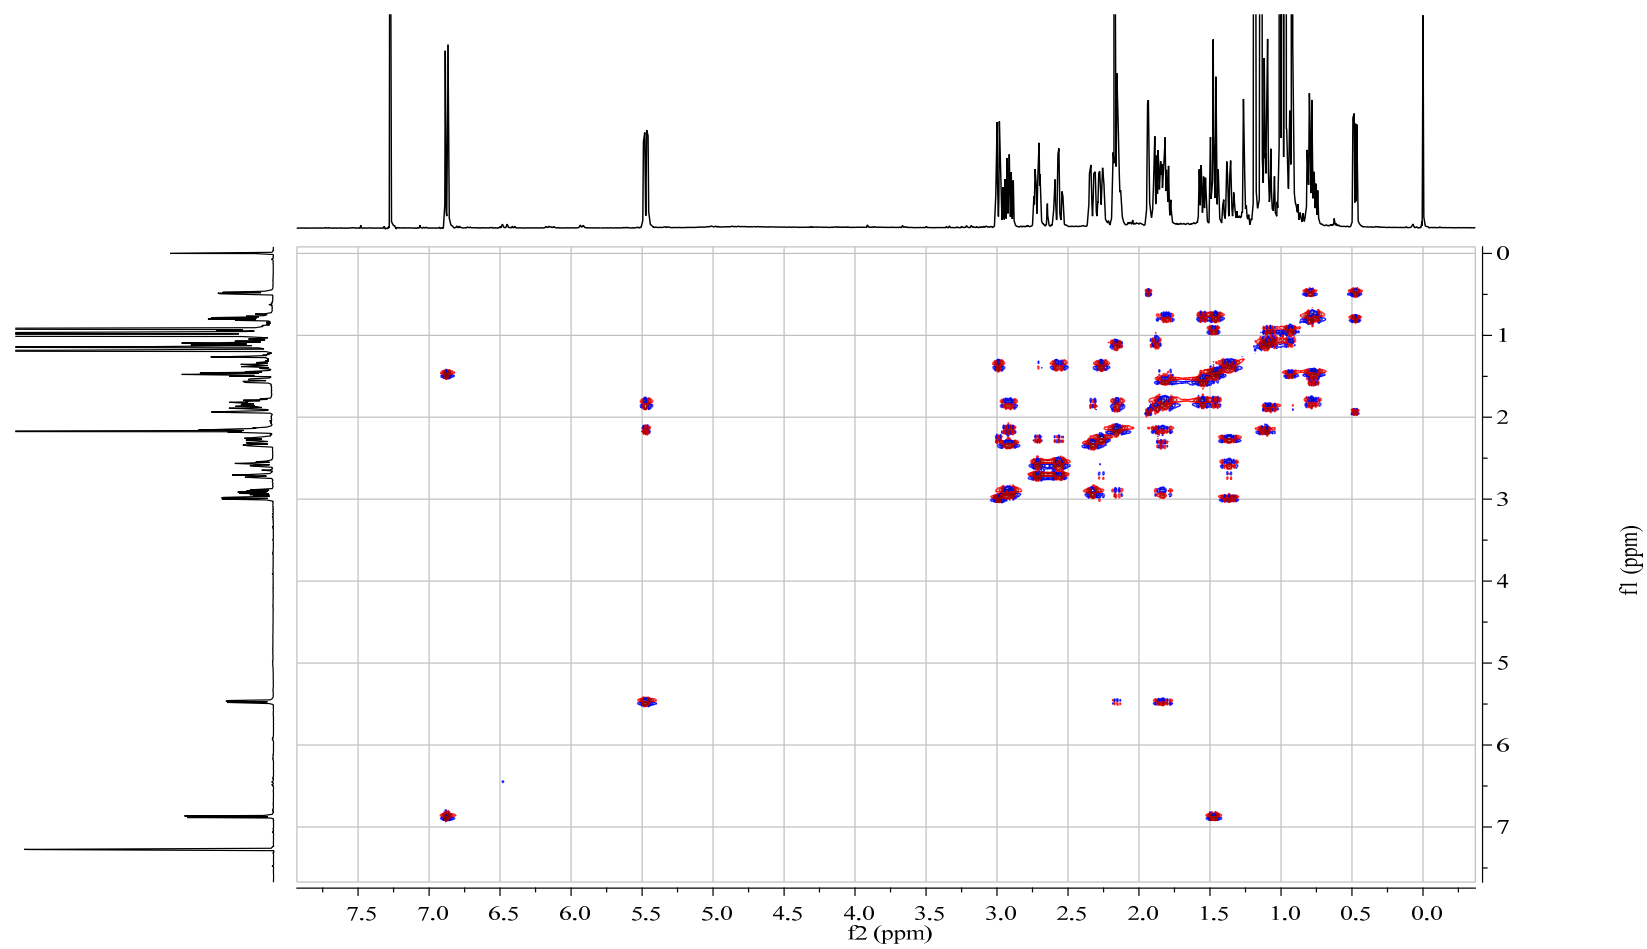

**Figure S18** 500 MHz HSQC NMR spectrum of **2** in  $\text{CDCl}_3$

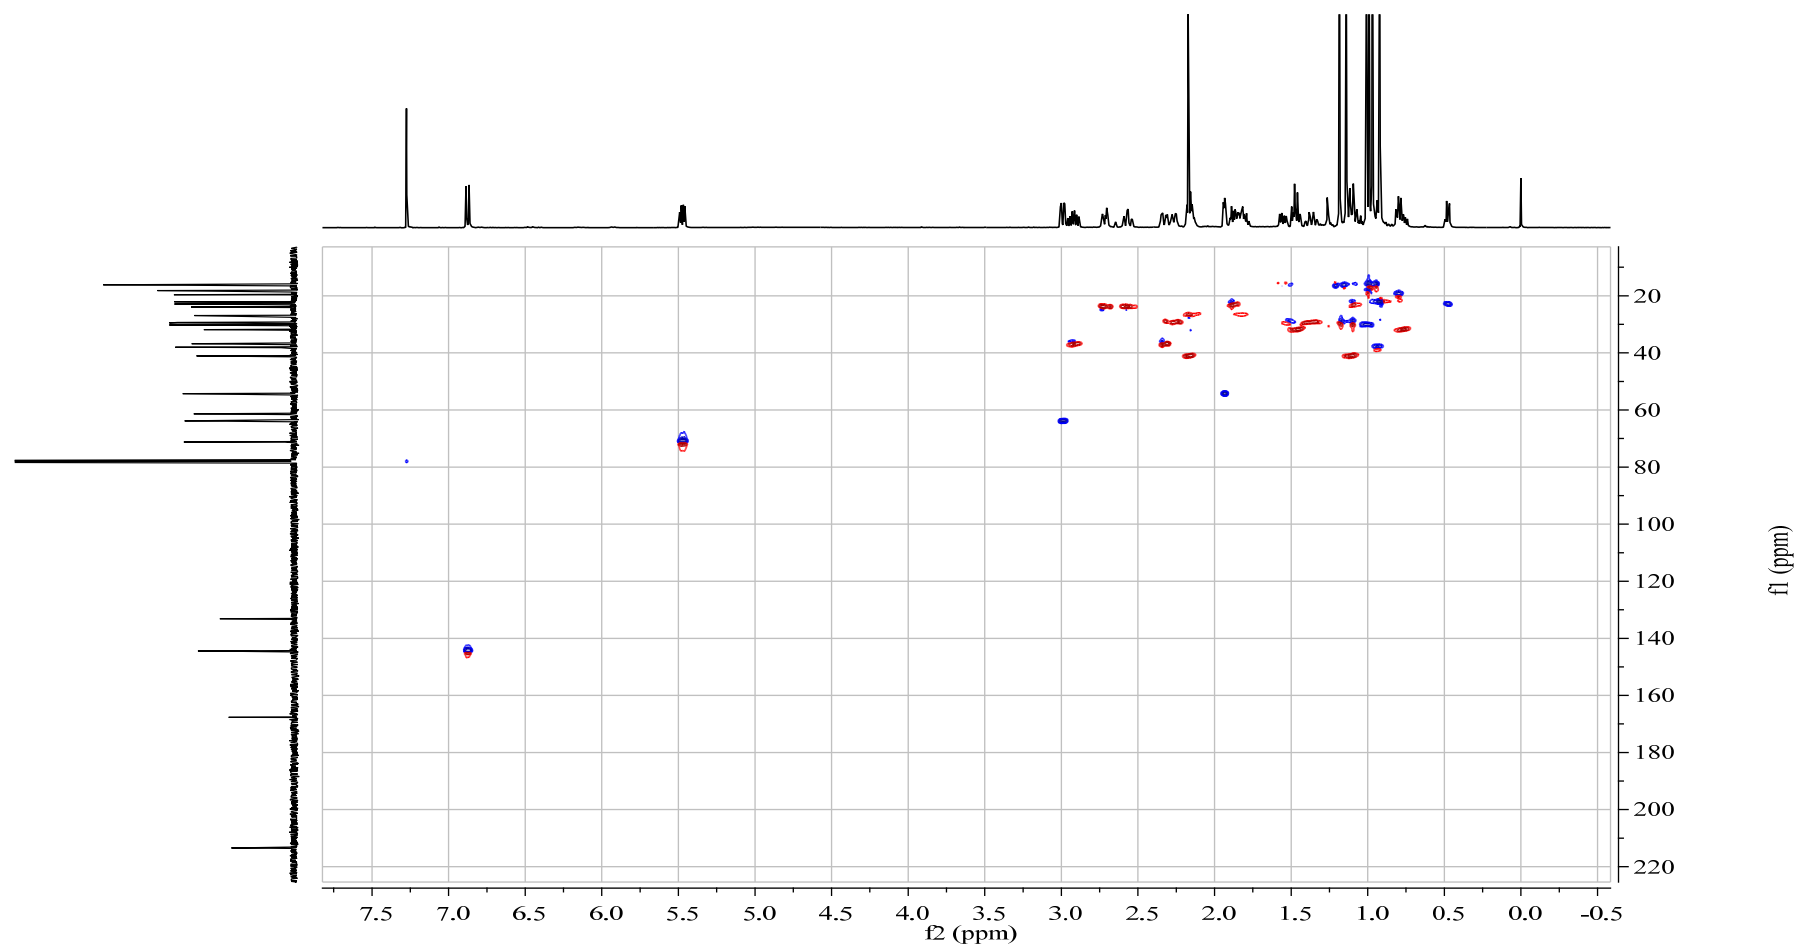

**Figure S19** 500 MHz HMBC NMR spectrum of **2** in CDCl<sub>3</sub>

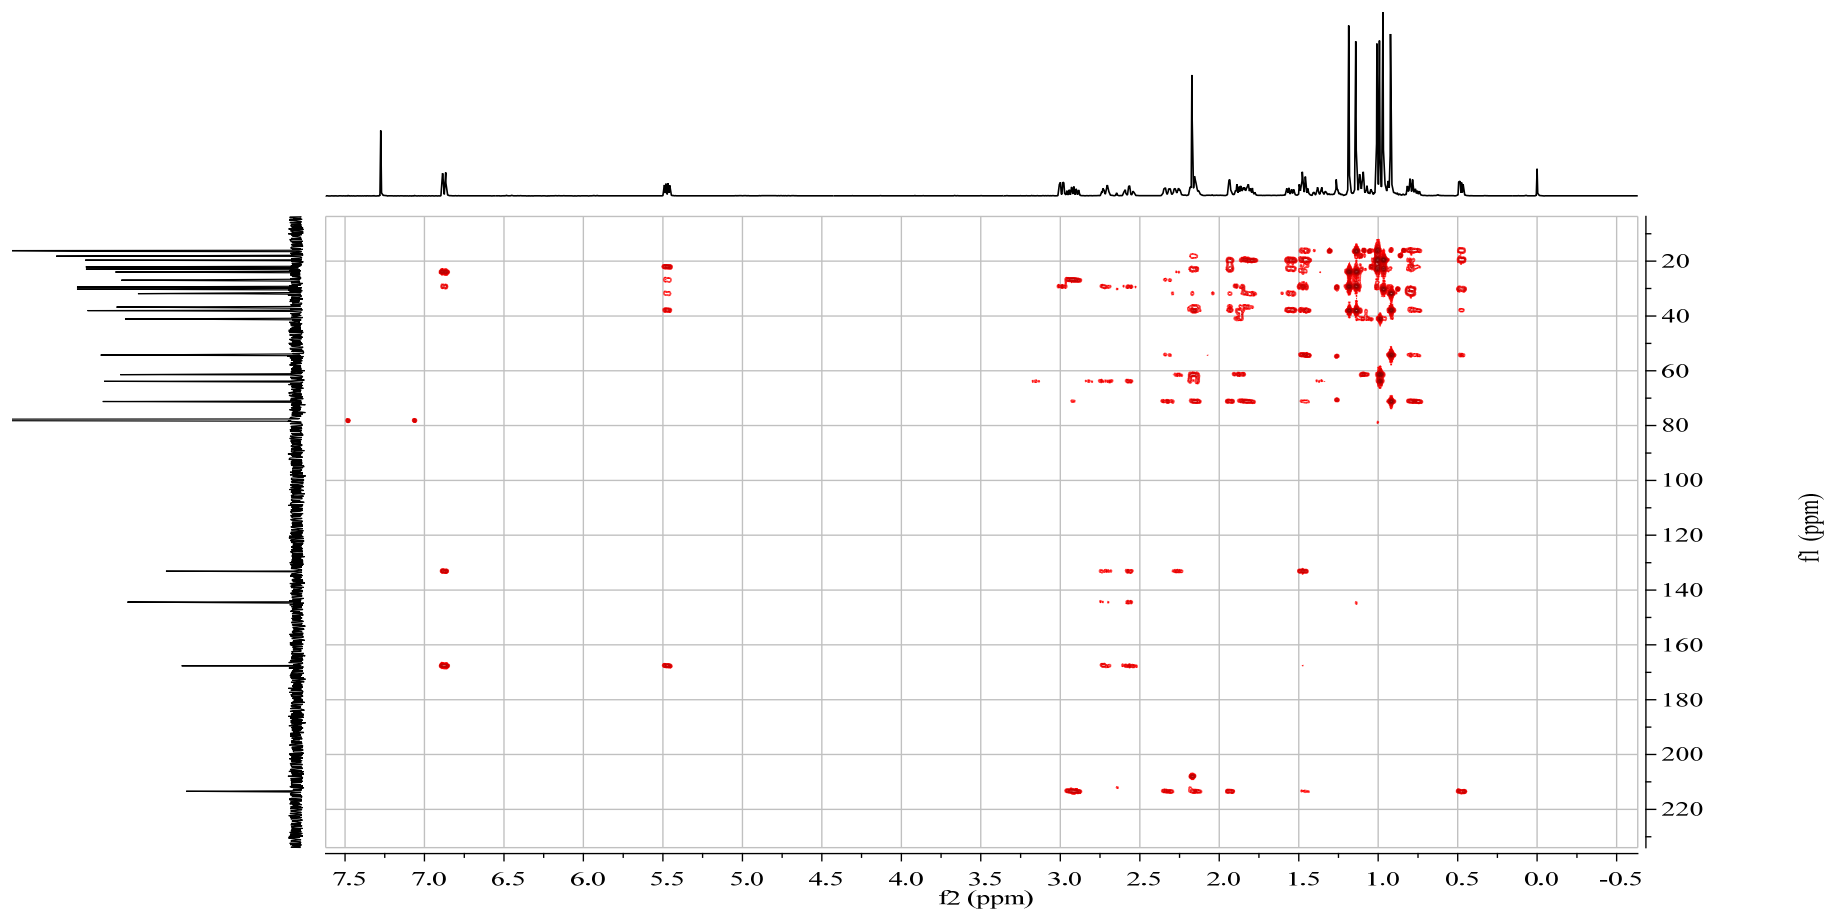

**Figure S20** 500 MHz NOESY spectrum of **2** in CDCl<sub>3</sub>

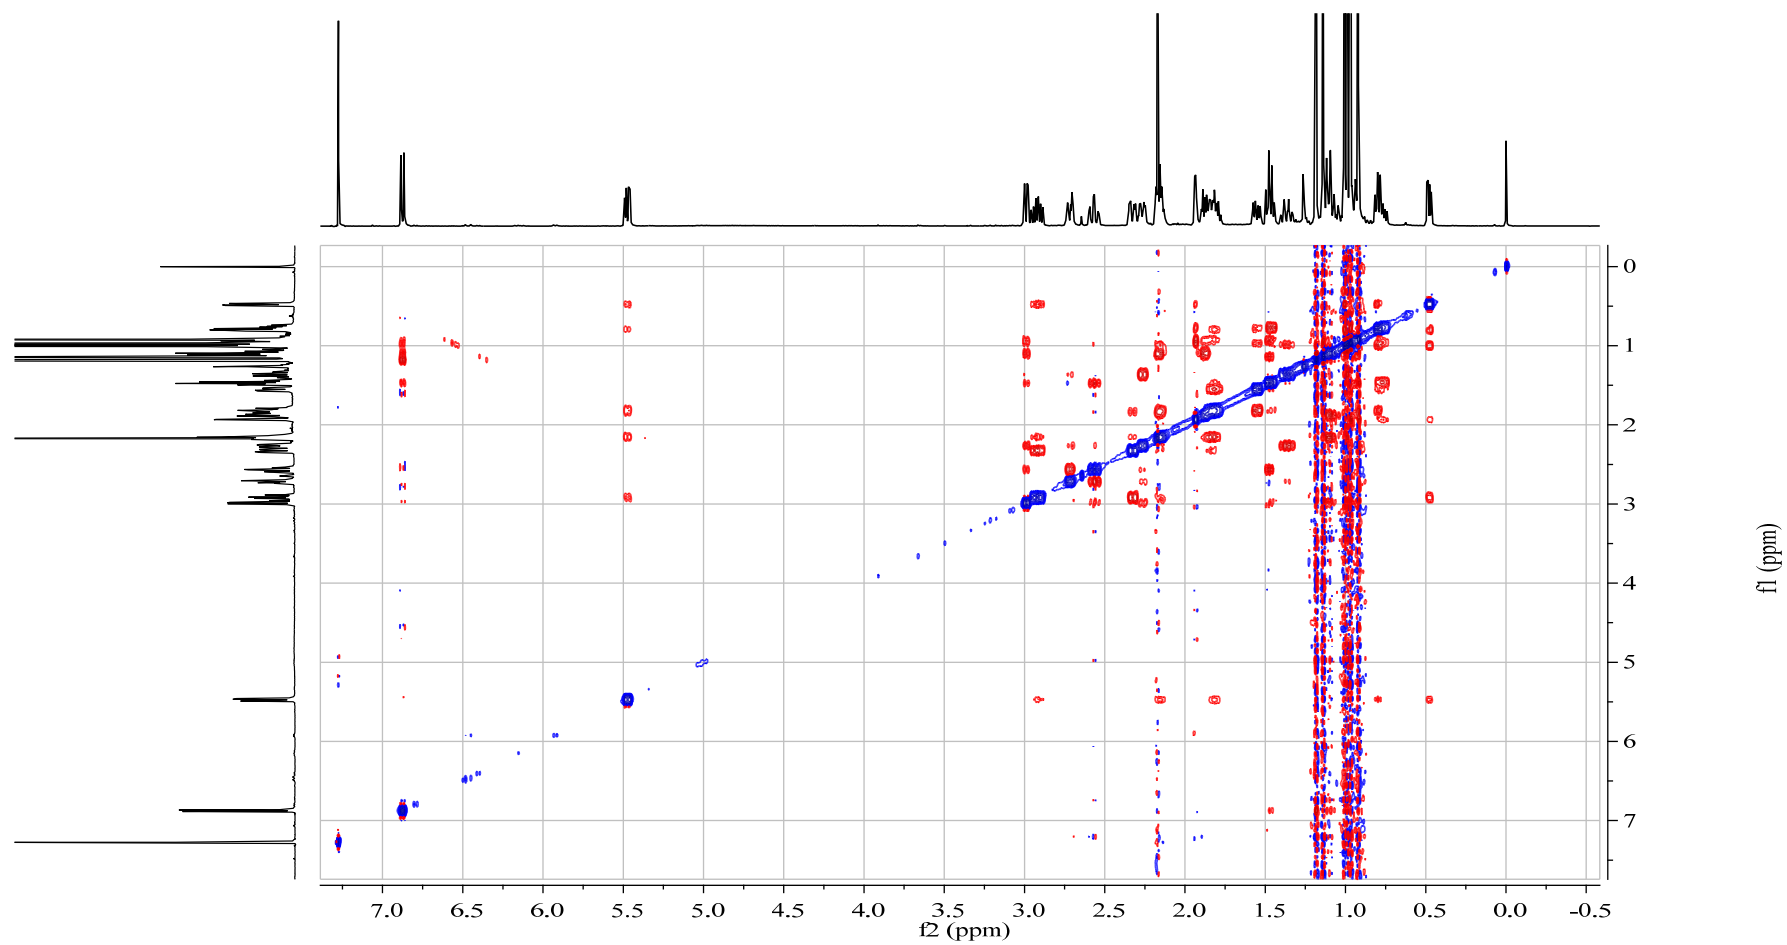

**Figure S22** HRESIMS spectrum of **3**

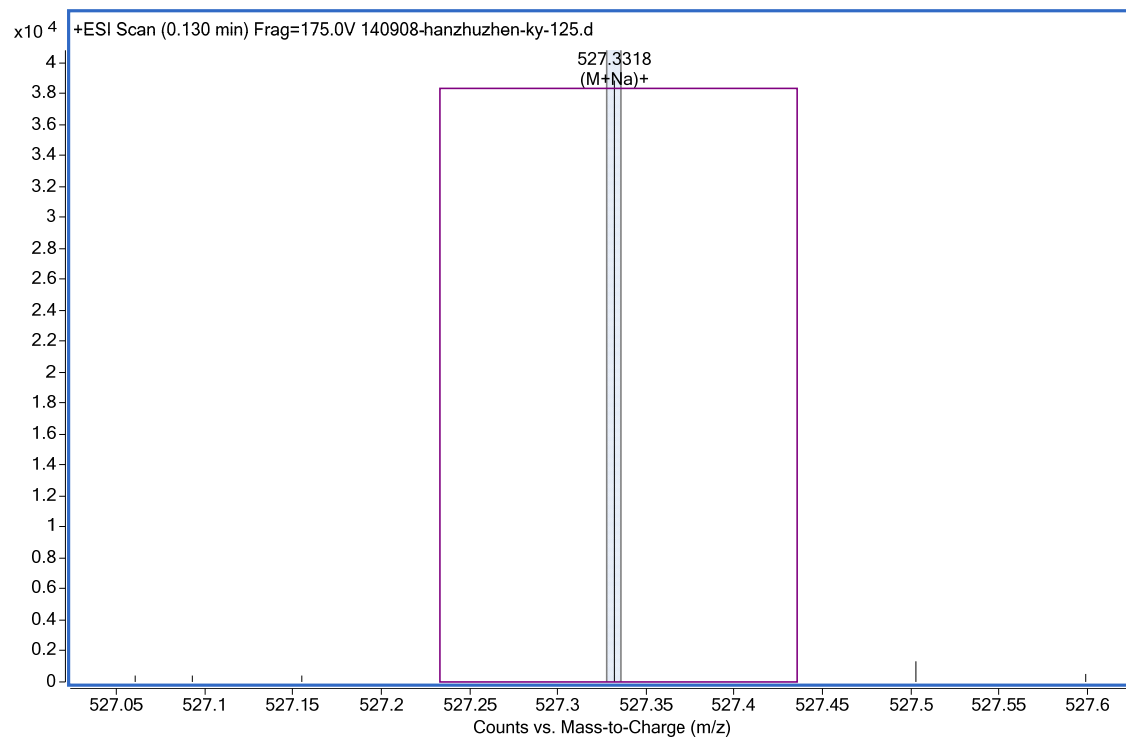

| 527.3318 |  | (M+Na)+     |               | C30 H48 Na O6 |       |             |          |           |
|----------|--|-------------|---------------|---------------|-------|-------------|----------|-----------|
| Best     |  | Formula (M) | Ion Formula   | Calc m/z      | Score | Cross Score | Mass     | Calc Mass |
| TRUE     |  | C30 H48 O6  | C30 H48 Na O6 | 527.3343      | 80.22 |             | 504.3426 | 504.3451  |

Figure S22 IR spectrum of 3

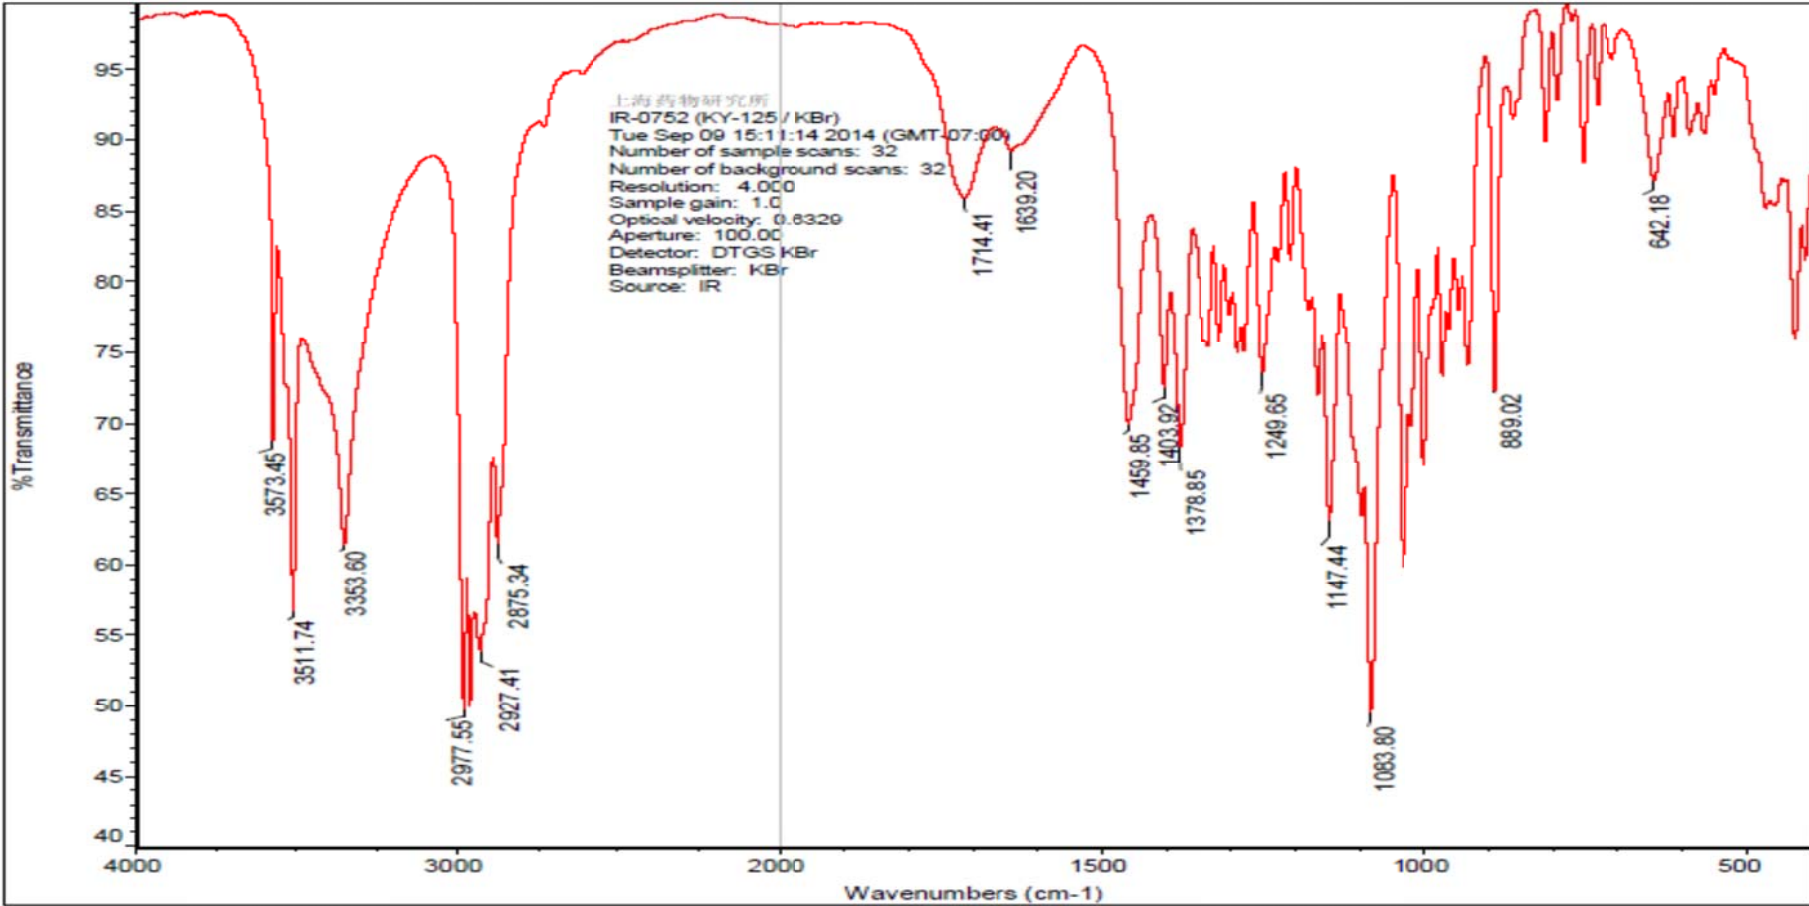

Figure S23 500 MHz  $^1\text{H}$  NMR spectrum of **3** in  $\text{CD}_3\text{OD}$

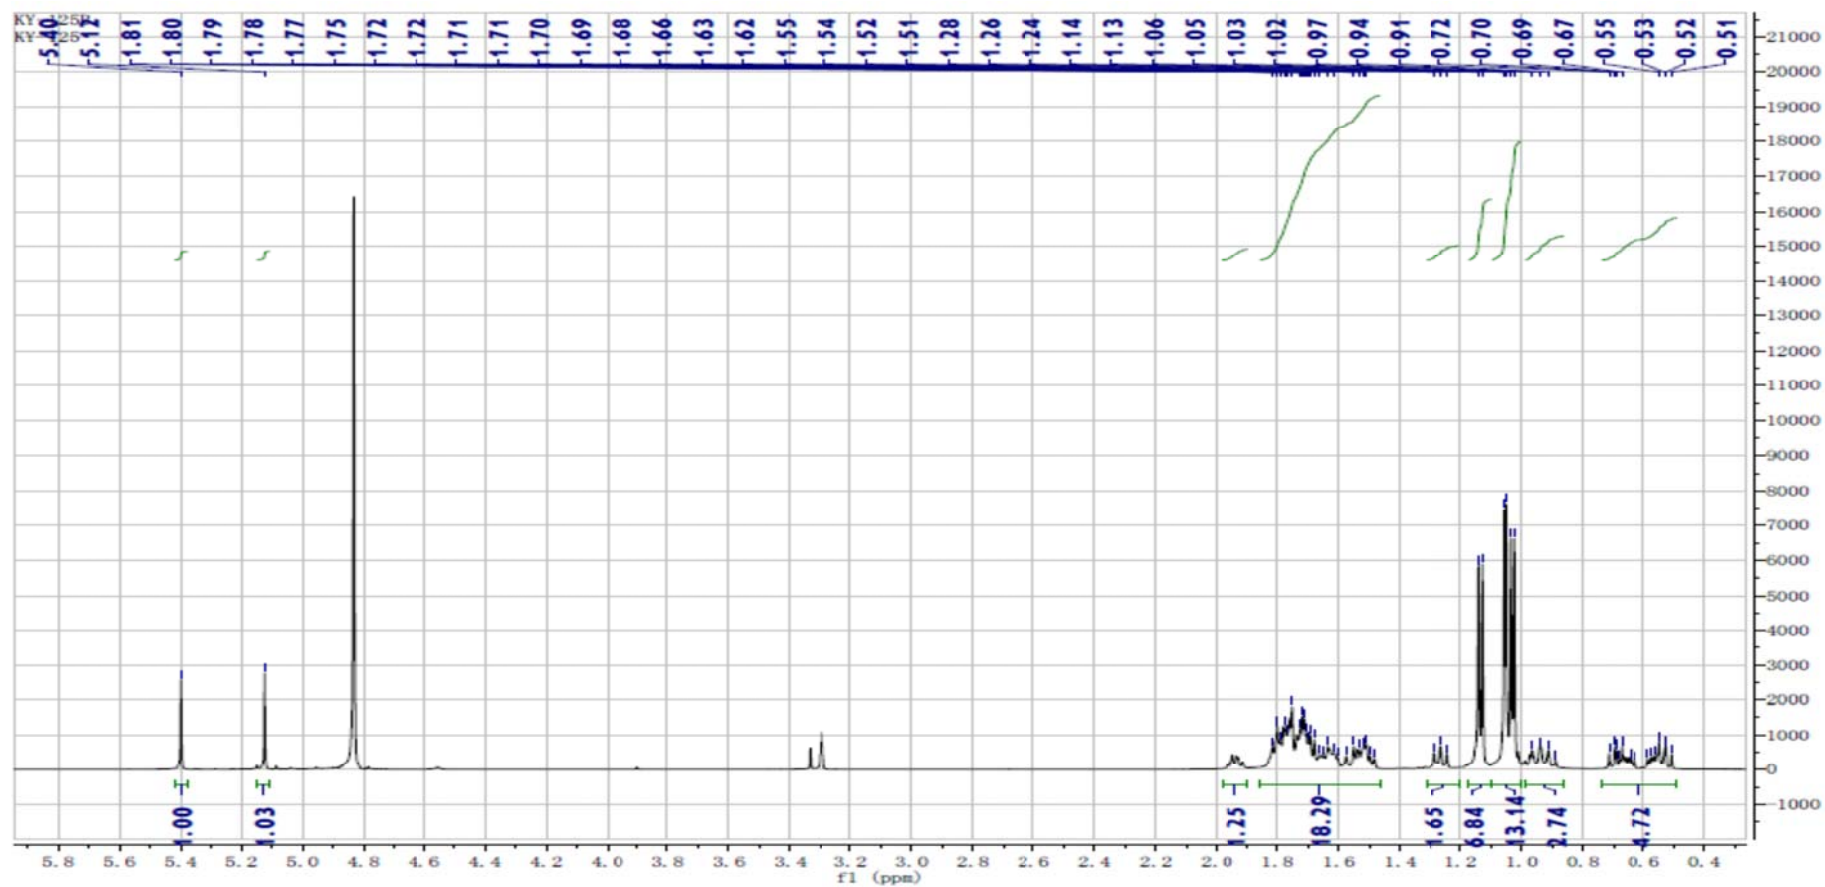

Figure S24 125 MHz  $^{13}\text{C}$  NMR spectrum of **3** in  $\text{CD}_3\text{OD}$

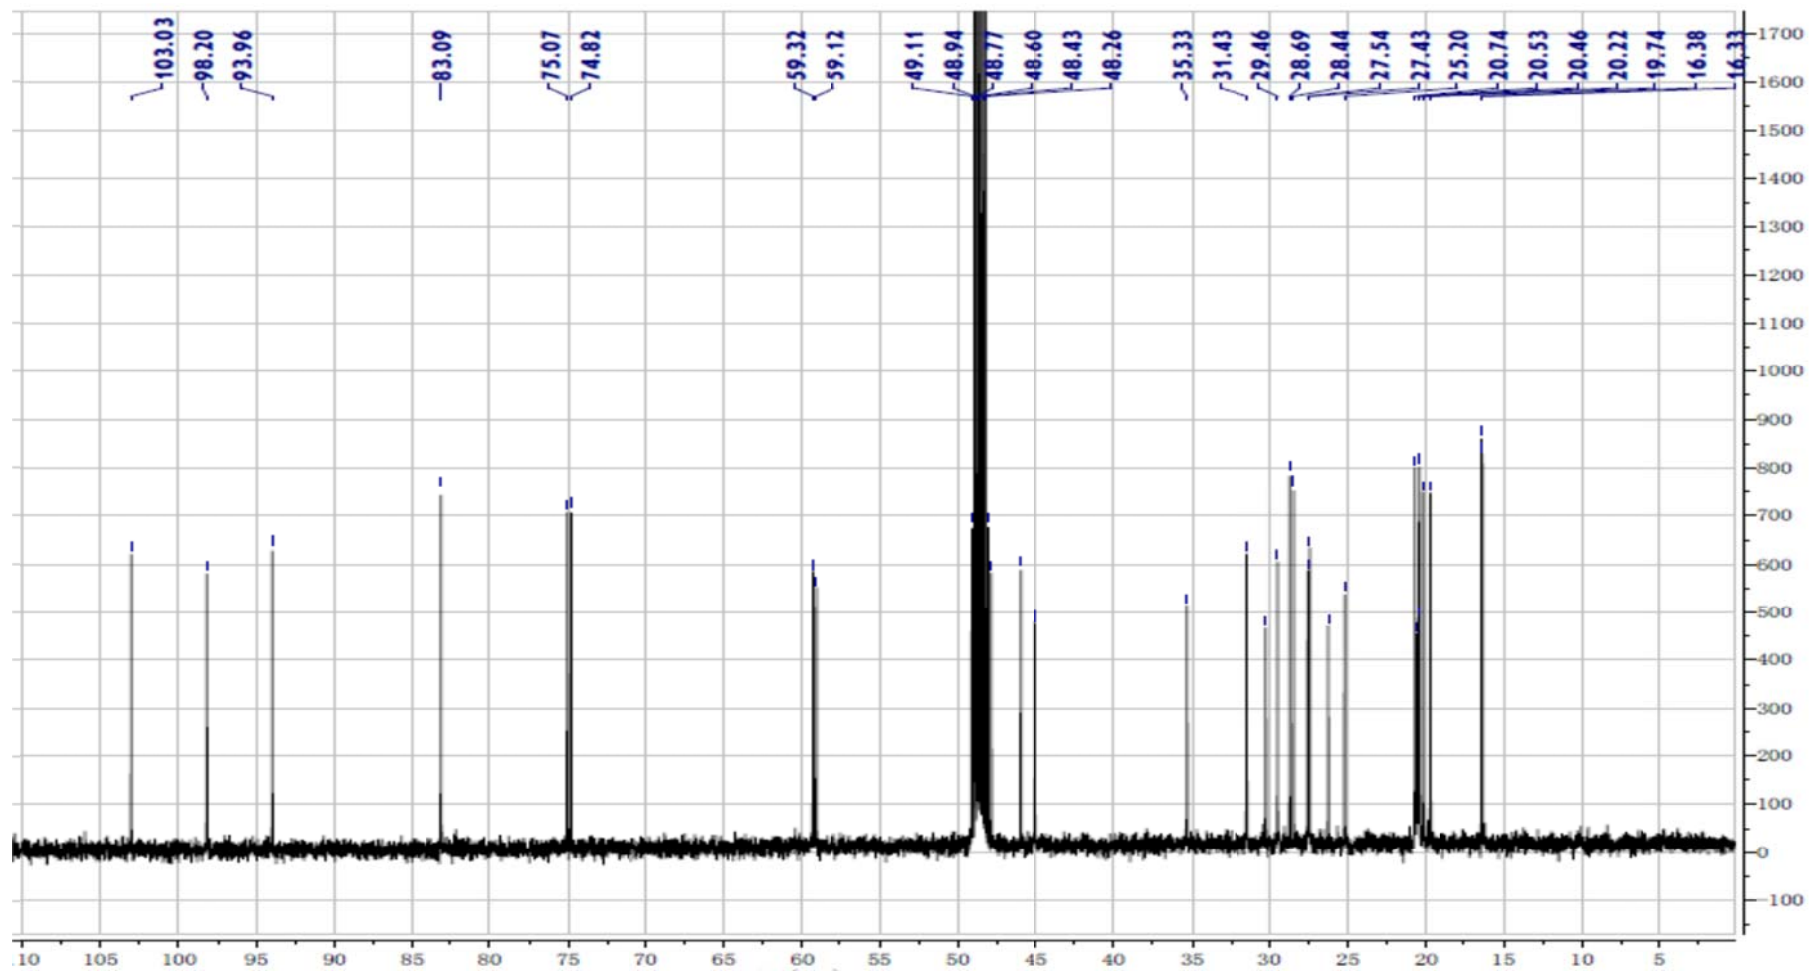



**Figure S25** 125 MHz DEPT spectrum of **3** in CD<sub>3</sub>OD

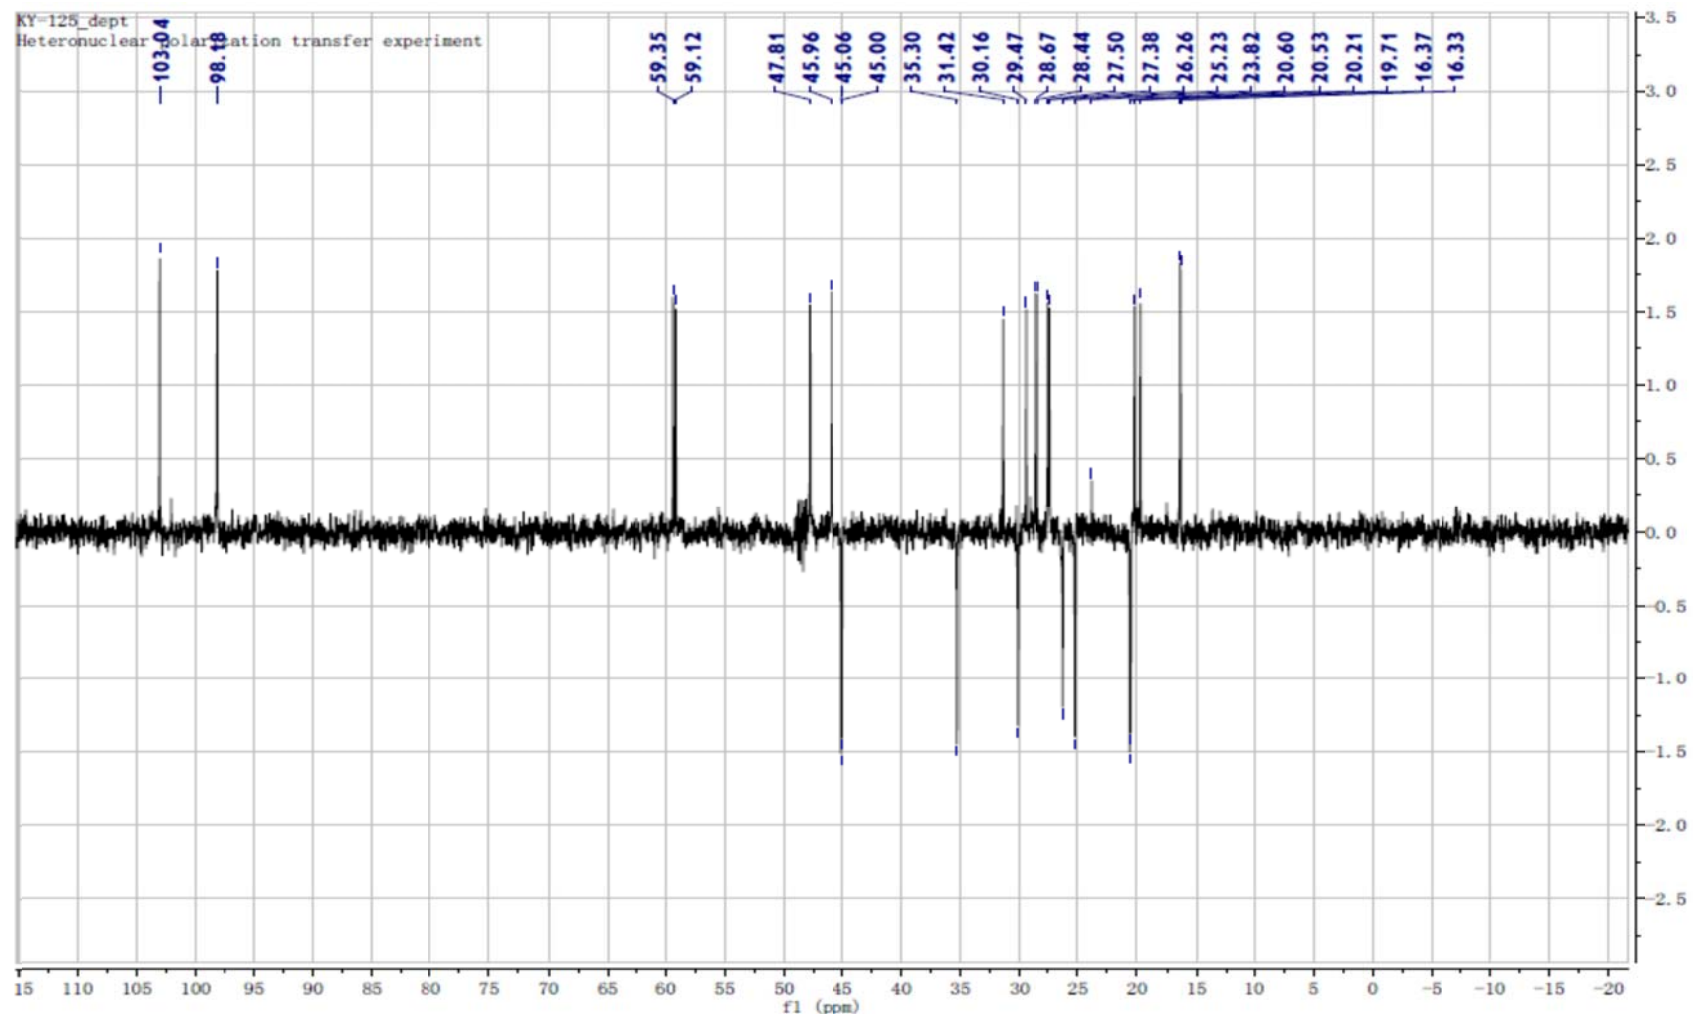

**Figure S26** 500 MHz  $^1\text{H}$ - $^1\text{H}$  COSY NMR spectrum of **3** in  $\text{CD}_3\text{OD}$

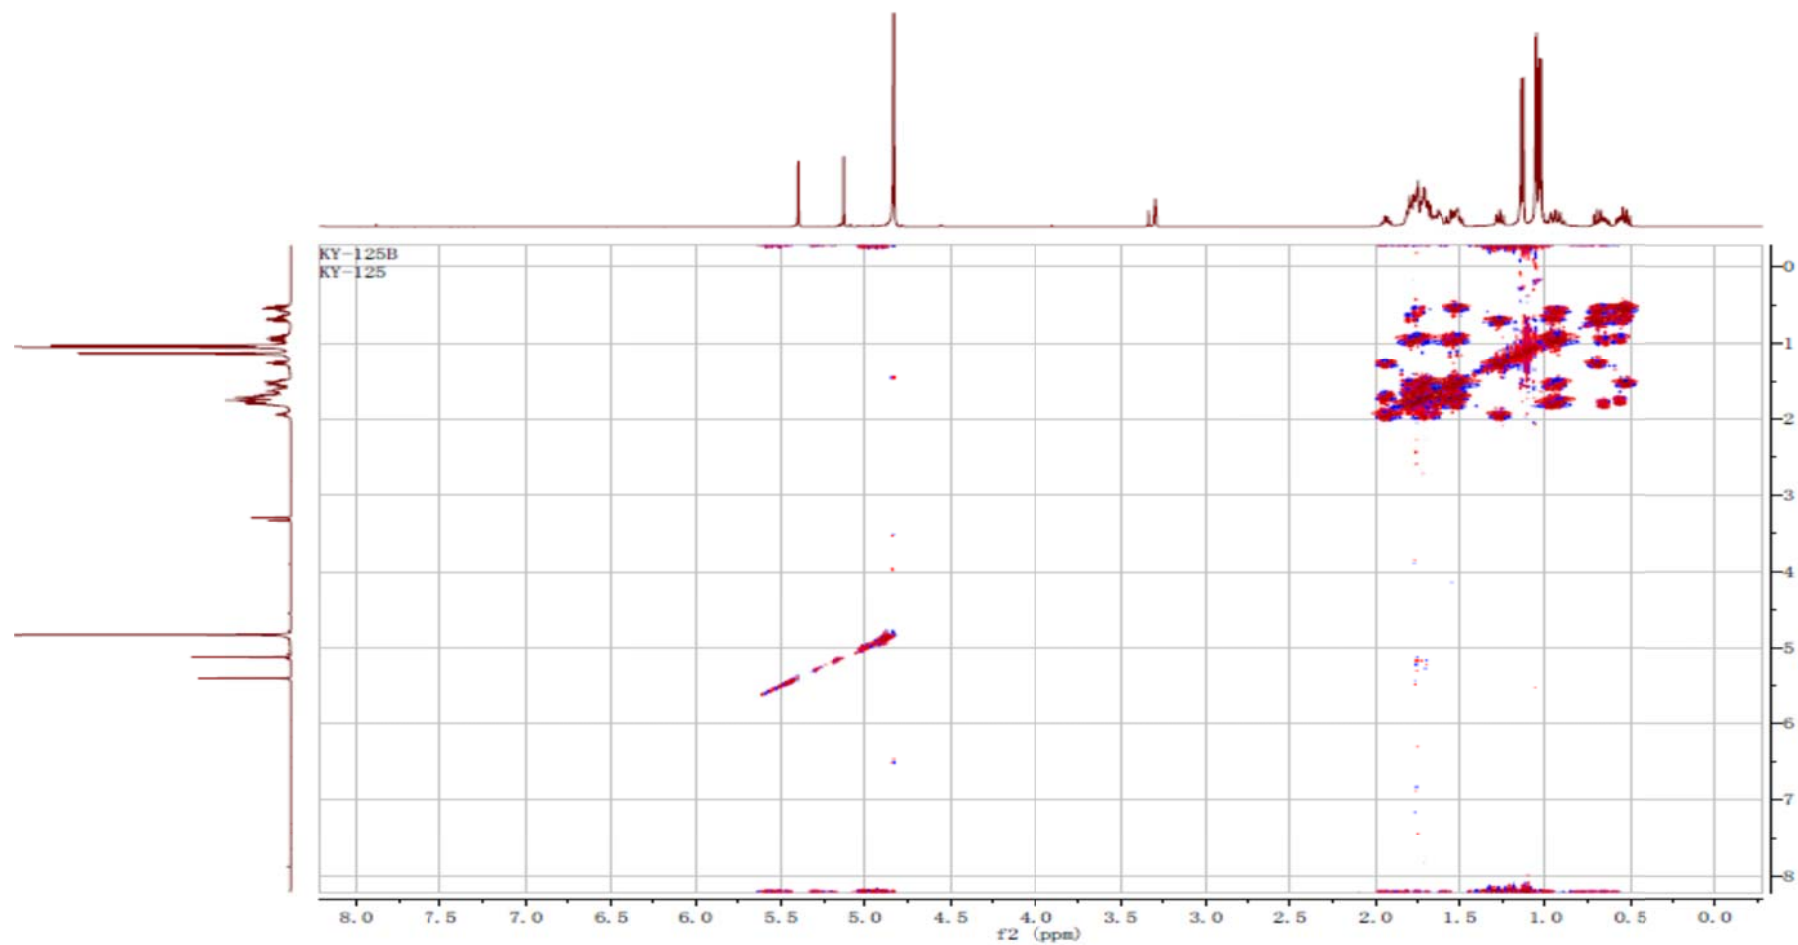

**Figure S27** 500 MHz HSQC NMR spectrum of **3** in CD<sub>3</sub>OD

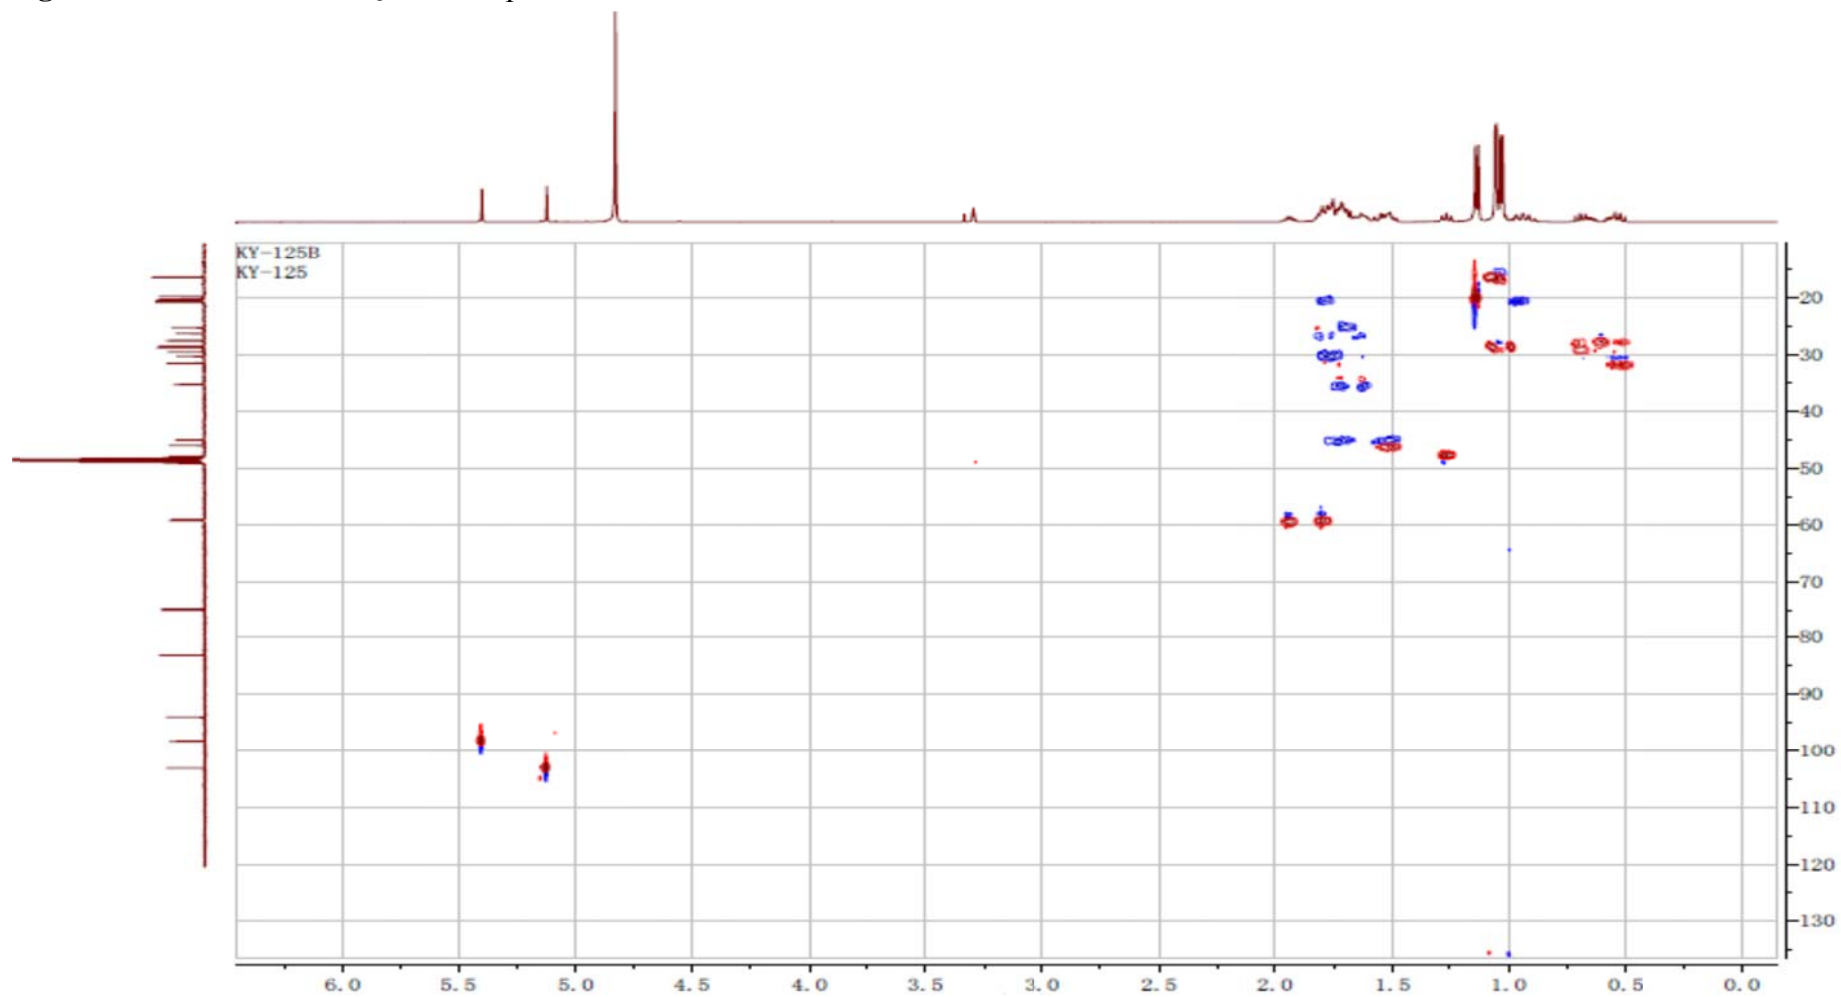

**Figure S28** 500 MHz HMBC NMR spectrum of **3** in CD<sub>3</sub>OD

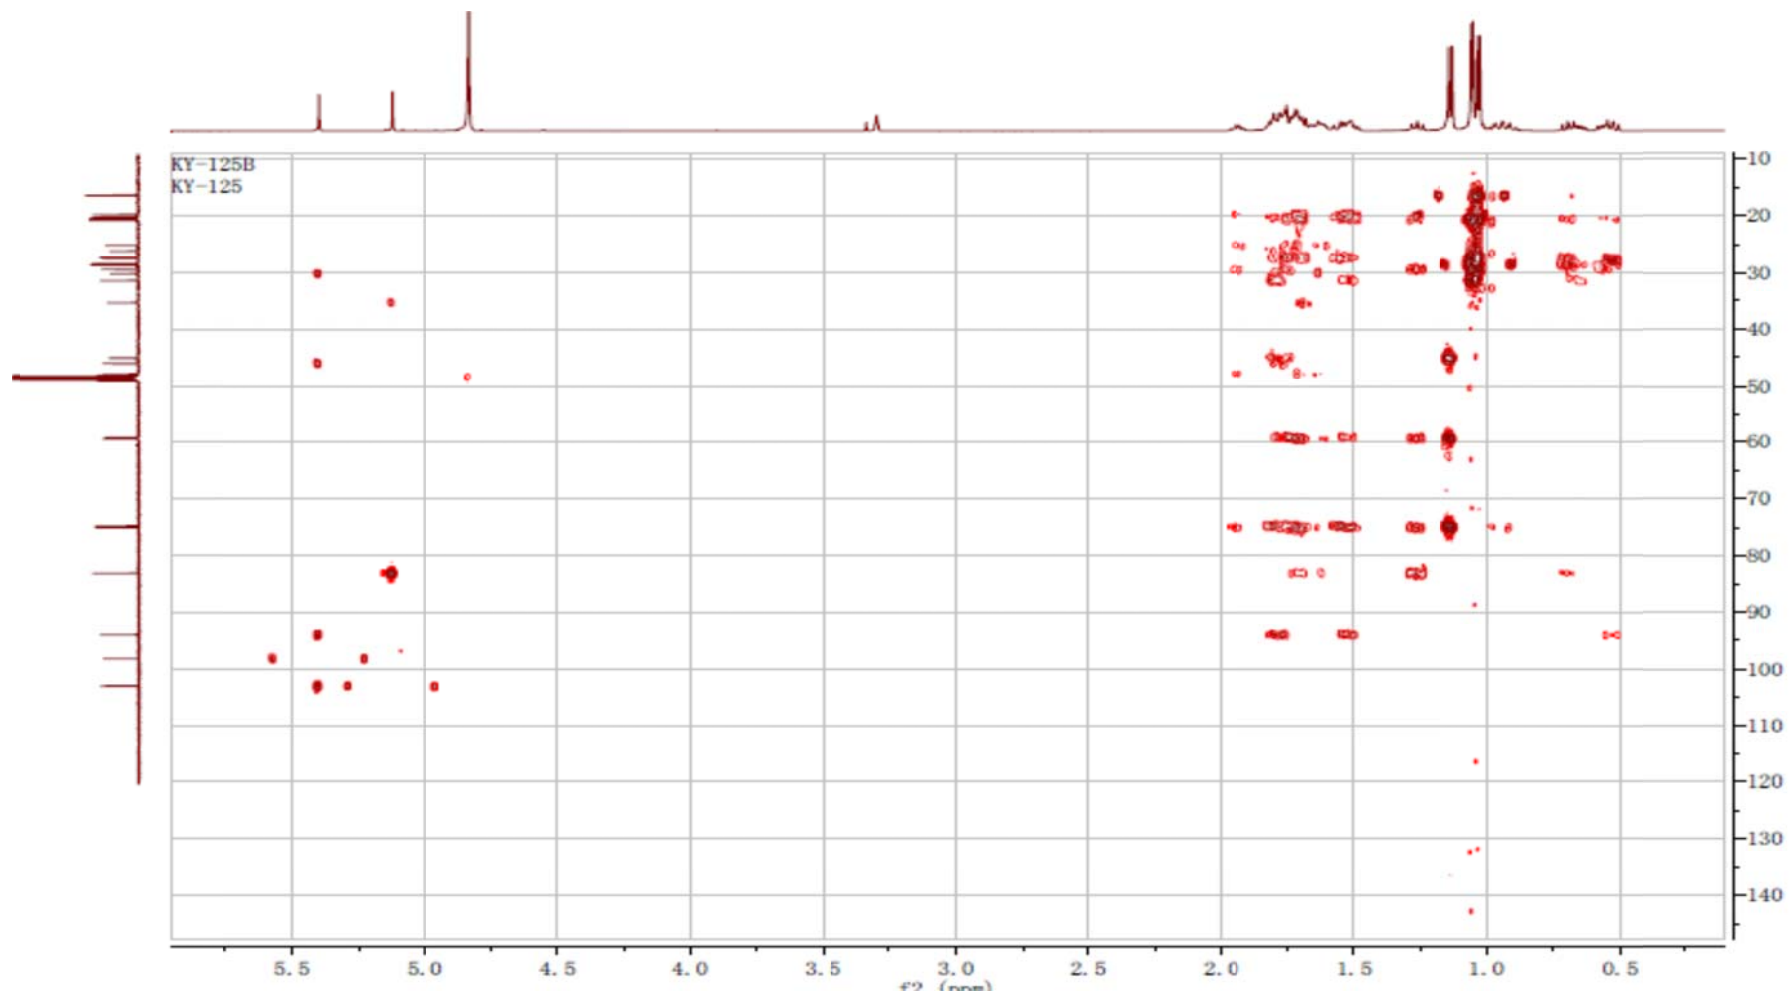

**Figure S29** 500 MHz NOESY NMR spectrum of **3** in CD<sub>3</sub>OD

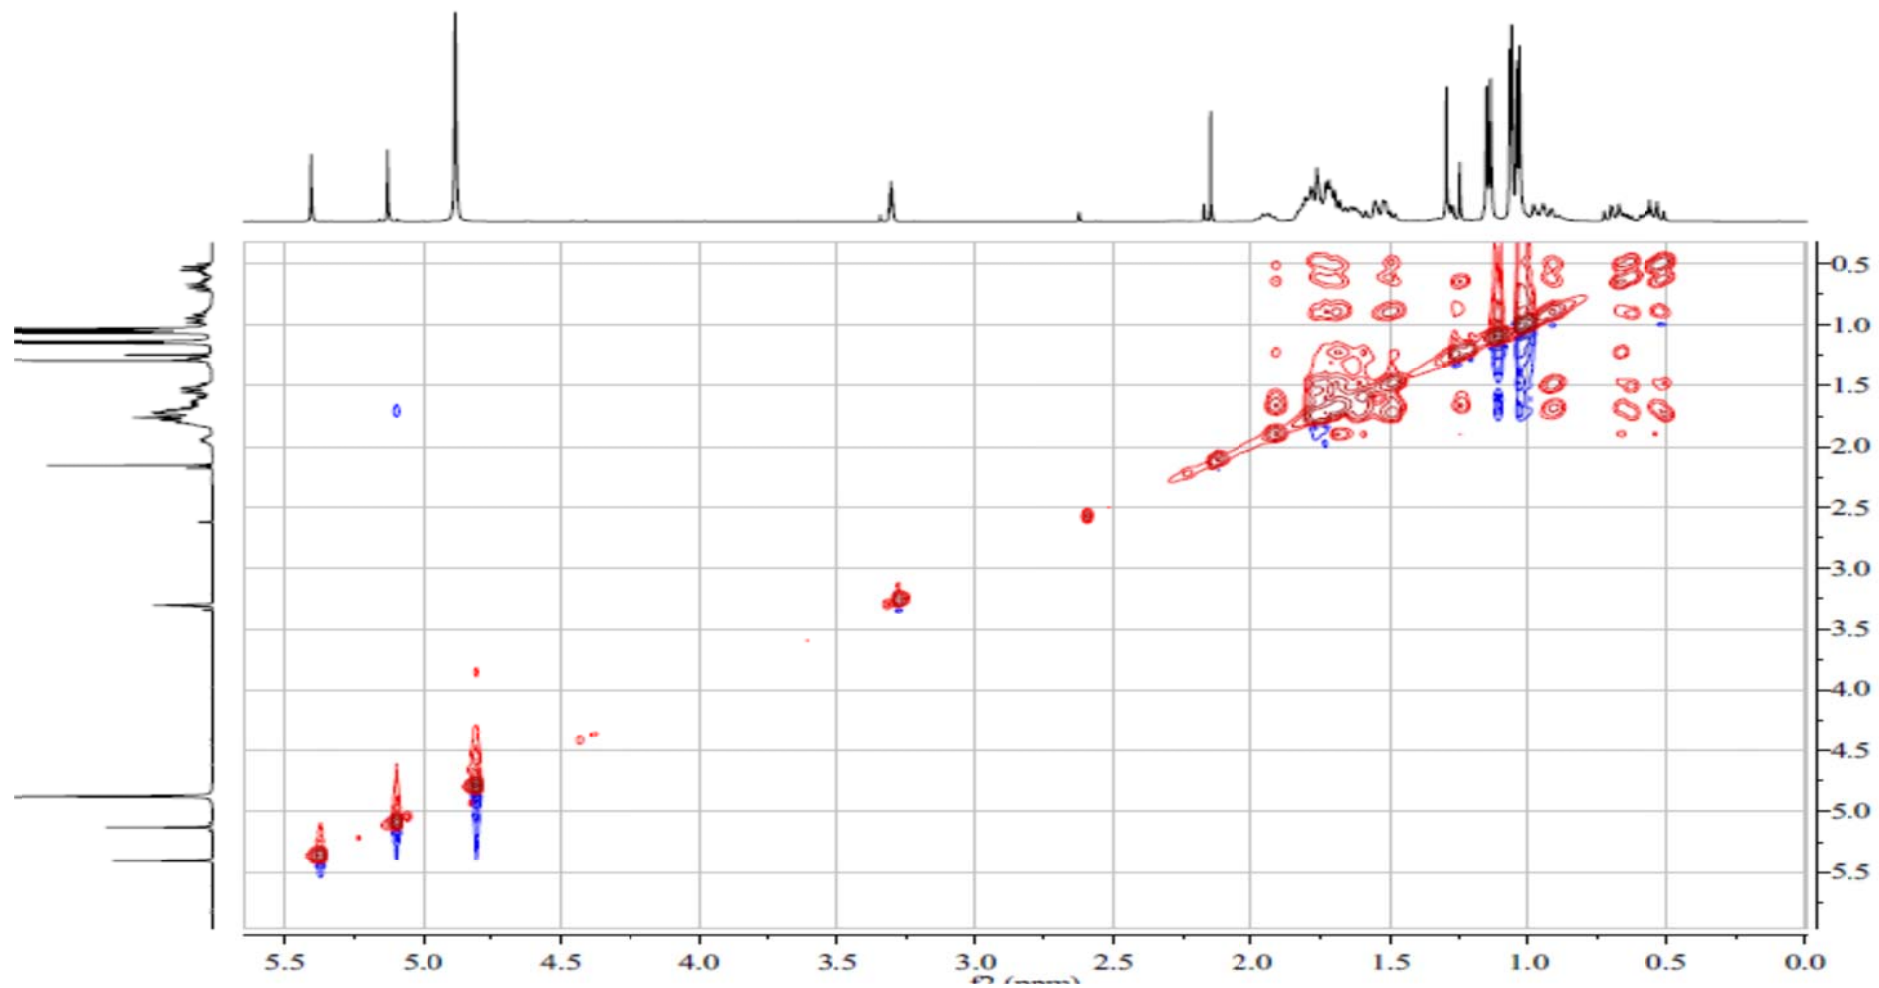

**Figure S30** Single X-ray crystal structure and Packing diagram of **3**

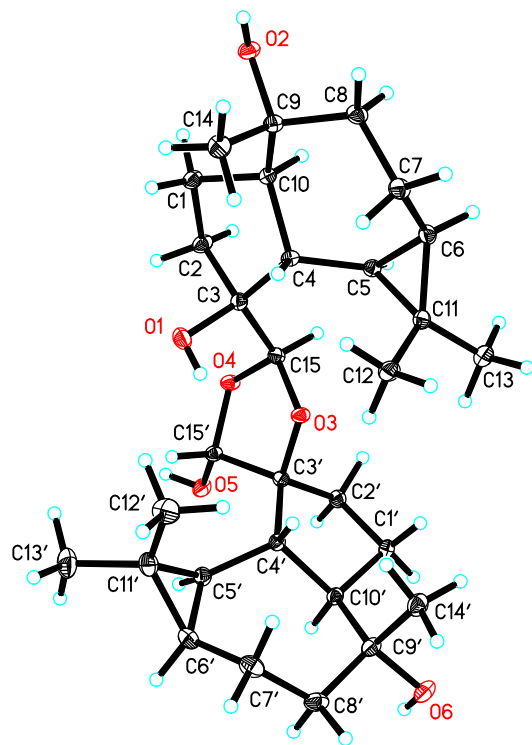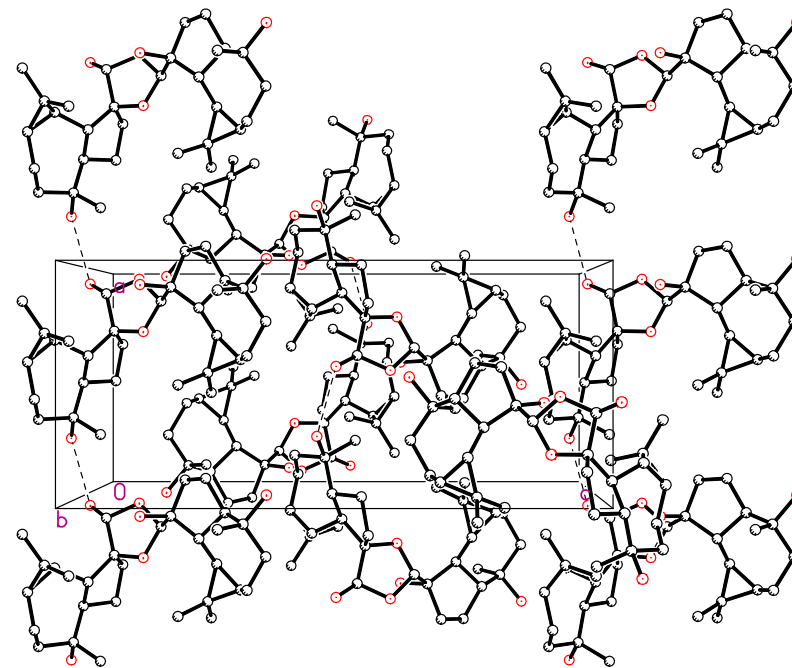

**Crystallographic data of 1**

|                                                |                                                                                                          |
|------------------------------------------------|----------------------------------------------------------------------------------------------------------|
| Identification code                            | Cu_dm12499_0m                                                                                            |
| Empirical formula                              | C <sub>28</sub> H <sub>42</sub> O <sub>2</sub>                                                           |
| Formula weight                                 | 410.62                                                                                                   |
| Temperature                                    | 140 (2) K                                                                                                |
| Wavelength                                     | 1.54178 Å                                                                                                |
| Crystal system                                 | orthorhombic                                                                                             |
| Space group                                    | P 2(1) 2(1) 2(1)                                                                                         |
| Unit cell dimensions                           | a = 8.5312 (2) Å, $\alpha$ = 90 °; b = 11.5963 (2) Å, $\beta$ = 90 °; c = 24.0459 (5) Å, $\gamma$ = 90 ° |
| Volume                                         | 2378.87(9) Å <sup>3</sup>                                                                                |
| Z                                              | 4                                                                                                        |
| Calculated density                             | 1.147 mg/m <sup>3</sup>                                                                                  |
| Absorption coefficient                         | 0.530 mm <sup>-1</sup>                                                                                   |
| F(000)                                         | 904                                                                                                      |
| Crystal size                                   | 0.28 × 0.25 × 0.13 mm <sup>3</sup>                                                                       |
| Theta range for data collection                | 4.23 to 69.65 °                                                                                          |
| Limiting indices                               | -9 ≤ h ≤ 10<br>-13 ≤ k ≤ 14<br>-29 ≤ l ≤ 29                                                              |
| Reflections collected / unique                 | 18693/4410 [R(int) = 0.0379]                                                                             |
| Completeness to theta = 64.99                  | 99.3 %                                                                                                   |
| Absorption correction                          | Semi-empirical from equivalents                                                                          |
| Max. and min. transmission                     | 0.9343 and 0.8658                                                                                        |
| Refinement method                              | Full-matrix least-squares on F <sup>2</sup>                                                              |
| Data / restraints / parameters                 | 4410/0/277                                                                                               |
| Goodness-of-fit on F <sup>2</sup>              | 1.086                                                                                                    |
| Final R indices [I > 2σ(I)]                    | R <sub>1</sub> = 0.0350, wR <sub>2</sub> = 0.1078                                                        |
| R indices (all data)                           | R <sub>1</sub> = 0.0353, wR <sub>2</sub> = 0.1085                                                        |
| Absolute structure parameter (flack parameter) | -0.01 (18)                                                                                               |
| Largest diff. peak and hole                    | 0.204 and -0.213 e. Å <sup>-3</sup>                                                                      |

Single crystal for analysis was obtained from acetone solution. Data collection was performed

---

with a *Bruker APEX2 CCD* and graphite monochromated *CuK $\alpha$*  radiation ( $\lambda = 1.54178 \text{ \AA}$ ) at 140 (2) K. *Bruker SAINT*. Program used to solve and refine structure: *SHELXS-97*, *SHELXL-97*, resp. Crystallographic data for have been deposited at the Cambridge Crystallographic Data Centre (deposition no. CCDC 928251). Copies of these data can be obtained free of charge via [www.ccdc.cam.ac.uk/conts/retrieving.html](http://www.ccdc.cam.ac.uk/conts/retrieving.html) or from the Cambridge Crystallographic Data Centre, 12, Union Road, Cambridge CB21EZ, UK. [fax: (+44) 1223-336-033; or email: [deposit@ccdc.cam.ac.uk](mailto:deposit@ccdc.cam.ac.uk)].



### Crystallographic data of 3

|                                                |                                                                                                                        |
|------------------------------------------------|------------------------------------------------------------------------------------------------------------------------|
| Identification code                            | Cu_dm116252_0m                                                                                                         |
| Empirical formula                              | C <sub>30</sub> H <sub>48</sub> O <sub>6</sub>                                                                         |
| Formula weight                                 | 504.68                                                                                                                 |
| Temperature                                    | 173 (2) K                                                                                                              |
| Wavelength                                     | 1.54178 Å                                                                                                              |
| Crystal system                                 | orthorhombic                                                                                                           |
| Space group                                    | P 2(1) 2(1) 2(1)                                                                                                       |
| Unit cell dimensions                           | a = 9.0356 (2) Å, $\alpha = 90^\circ$ ; b = 14.7212 (2) Å, $\beta = 90^\circ$ ; c = 20.2608 (3) Å, $\gamma = 90^\circ$ |
| Volume                                         | 2694.99 (12) Å <sup>3</sup>                                                                                            |
| Z                                              | 4                                                                                                                      |
| Calculated density                             | 1.244 mg/m <sup>3</sup>                                                                                                |
| Absorption coefficient                         | 0.676 mm <sup>-1</sup>                                                                                                 |
| F(000)                                         | 1104                                                                                                                   |
| Crystal size                                   | 0.18 × 0.16 × 0.15 mm <sup>3</sup>                                                                                     |
| Theta range for data collection                | 3.71 to 66.61 °                                                                                                        |
| Limiting indices                               | -10 ≤ h ≤ 10<br>-17 ≤ k ≤ 17<br>-22 ≤ l ≤ 24                                                                           |
| Reflections collected / unique                 | 51177/4760 [R(int) = 0.0346]                                                                                           |
| Completeness to theta = 64.99                  | 99.8 %                                                                                                                 |
| Absorption correction                          | Semi-empirical from equivalents                                                                                        |
| Max. and min. transmission                     | 0.9054 and 0.8880                                                                                                      |
| Refinement method                              | Full-matrix least-squares on F <sup>2</sup>                                                                            |
| Data / restraints / parameters                 | 4760/0/335                                                                                                             |
| Goodness-of-fit on F <sup>2</sup>              | 1.027                                                                                                                  |
| Final R indices [I > 2σ(I)]                    | R <sub>1</sub> = 0.0265, wR <sub>2</sub> = 0.0711                                                                      |
| R indices (all data)                           | R <sub>1</sub> = 0.0270, wR <sub>2</sub> = 0.0715                                                                      |
| Absolute structure parameter (flack parameter) | -0.08 (11)                                                                                                             |
| Largest diff. peak and hole                    | 0.173 and -0.157 e. Å <sup>-3</sup>                                                                                    |

Single crystal for analysis was obtained from 70% methanol-water solution. Data collection was performed with a *Bruker APEX2 CCD* and graphite monochromated *CuK $\alpha$*  radiation ( $\lambda = 1.54178$

---

Å) at 140 (2) K. *Bruker* SAINT. Program used to solve and refine structure: SHELXS-97, SHELXL-97, resp. Crystallographic data for have been deposited at the Cambridge Crystallographic Data Centre (deposition no. CCDC 931555). Copies of these data can be obtained free of charge via [www.ccdc.cam.ac.uk/conts/retrieving.html](http://www.ccdc.cam.ac.uk/conts/retrieving.html) or from the Cambridge Crystallographic Data Centre, 12, Union Road, Cambridge CB21EZ, UK. [fax: (+44) 1223-336-033; or email: [deposit@ccdc.cam.ac.uk](mailto:deposit@ccdc.cam.ac.uk)].
